# Supplementary material
Source: publisher figshare collection journal article supplement (https://acs.figshare.com/ndownloader/files/4637095)
Supplement: Supplementary file 1 [file 4637095]

## Supporting Information

### Design of a ‘New Motif’ with $\beta$ -Amino Acids and $\alpha$ -Aminoxy Acids:

### Synthesis of Hybrid Peptides with 12/10-Helix\*\*

Gangavaram V. M. Sharma,\* Vennampalli Manohar, Samit K. Dutta, Velaparthi Subash  
and Ajit C. Kunwar\*

Indian Institute of Chemical Technology, Hyderabad 500 007 (India)

### Table of Contents

| Contents                                                                   | Page No. |
|----------------------------------------------------------------------------|----------|
| 1. General experimental                                                    | S 4      |
| 2. Synthesis of peptides <b>3b</b> and <b>4b</b> ; <b>5a</b> and <b>5b</b> | S 4      |
| 3. $^1\text{H}$ NMR spectrum of peptide <b>3a</b>                          | S 6      |
| 4. TOCSY spectrum of peptide <b>3a</b>                                     | S 7      |
| 5. ROESY spectrum of peptide <b>3a</b>                                     | S 8      |
| 6. HSQC spectrum of peptide <b>3a</b>                                      | S 9      |
| 7. HMBC spectrum of peptide <b>3a</b>                                      | S 10     |
| 8. Solvent titration plot for peptide <b>3a</b>                            | S 11     |
| 9. Distance constraints used in MD calculations for peptide <b>3a</b>      | S 11     |
| 10. $^1\text{H}$ NMR spectrum of peptide <b>4a</b>                         | S 12     |
| 11. TOCSY spectrum of peptide <b>4a</b>                                    | S 13     |
| 12. ROESY spectrum of peptide <b>4a</b>                                    | S 14     |
| 13. HSQC spectrum of peptide <b>4a</b>                                     | S 15     |
| 14. HMBC spectrum of peptide <b>4a</b>                                     | S 16     |
| 15. Solvent titration plot for peptide <b>4a</b>                           | S 17     |
| 16. Distance constraints used in MD calculations for peptide <b>4a</b>     | S 17     |
| 17. $^1\text{H}$ NMR chemical shift table of peptide <b>5a</b>             | S 18     |
| 18. $^1\text{H}$ NMR spectrum of peptide <b>5a</b>                         | S 19     |
| 19. TOCSY spectrum of peptide <b>5a</b>                                    | S 20     |

|                                                                        |      |
|------------------------------------------------------------------------|------|
| 20. ROESY spectrum of peptide <b>5a</b>                                | S 21 |
| 21. HSQC spectrum of peptide <b>5a</b>                                 | S 22 |
| 22. HMBC spectrum of peptide <b>5a</b>                                 | S 23 |
| 23. Solvent titration plot for peptide <b>5a</b>                       | S 24 |
| 24. Distance constraints used in MD calculations for peptide <b>5a</b> | S 24 |
| 25. Stereoview of twenty superimposed structures of <b>5a</b>          | S 25 |
| 26. <sup>1</sup> H NMR chemical shift table of peptide <b>5b</b>       | S 26 |
| 27. <sup>1</sup> H NMR spectrum of peptide <b>5b</b>                   | S 27 |
| 28. TOCSY spectrum of peptide <b>5b</b>                                | S 28 |
| 29. ROESY spectrum of peptide <b>5b</b>                                | S 29 |
| 30. HSQC spectrum of peptide <b>5b</b>                                 | S 30 |
| 31. HMBC spectrum of peptide <b>5b</b>                                 | S 31 |
| 32. Solvent titration plot for peptide <b>5b</b>                       | S 32 |
| 33. <sup>1</sup> H NMR chemical shift table of peptide <b>3b</b>       | S 33 |
| 34. <sup>1</sup> H NMR spectrum of peptide <b>3b</b>                   | S 34 |
| 35. TOCSY spectrum of peptide <b>3b</b>                                | S 35 |
| 36. ROESY spectrum of peptide <b>3b</b>                                | S 36 |
| 37. HSQC spectrum of peptide <b>3b</b>                                 | S 37 |
| 38. HMBC spectrum of peptide <b>3b</b>                                 | S 38 |
| 39. Solvent titration plot for peptide <b>3b</b>                       | S 39 |
| 40. Distance constraints used in MD calculations for peptide <b>3b</b> | S 39 |
| 41. Stereoview of twenty superimposed structures of <b>3b</b>          | S 40 |
| 42. <sup>1</sup> H NMR shift table of peptide of peptide <b>4b</b>     | S 41 |
| 43. <sup>1</sup> H NMR spectrum of peptide <b>4b</b>                   | S 42 |
| 44. TOCSY spectrum of peptide <b>4b</b>                                | S 43 |
| 45. ROESY spectrum of peptide <b>4b</b>                                | S 44 |
| 46. HSQC spectrum of peptide <b>4b</b>                                 | S 45 |
| 47. HMBC spectrum of peptide <b>4b</b>                                 | S 46 |
| 48. Solvent titration plot for peptide <b>4b</b>                       | S 47 |
| 49. Distance constraints used in MD calculations for peptide <b>4b</b> | S 47 |
| 50. Stereoview of 20 superimposed structures of <b>4b</b>              | S 48 |

|                                                                        |      |
|------------------------------------------------------------------------|------|
| 51. CD spectra of peptides <b>3a</b> , <b>3b</b> and <b>5a</b> in MeOH | S 49 |
| 52. CD spectra of peptides <b>3a</b> , <b>3b</b> and <b>5a</b> in TFE  | S 50 |
| 53. CD spectra of peptides <b>4a</b> , <b>4b</b> and <b>5b</b> in MeOH | S 51 |
| 54. CD spectra of peptides <b>4a</b> , <b>4b</b> and <b>5b</b> in TFE  | S 52 |

**General experimental:** The monomer (*R*)- $\beta$ -Caa was synthesized from D-glucose and the monomer (*R*)-Ama was synthesized from L-ethyl lactate. The monomers (*S*)- $\beta$ -hAla and Ama were synthesized from L-Ala and ethyl glycolate respectively. Deprotection of Boc-group was achieved with CF<sub>3</sub>COOH (0.1 mL per 100 mg) in CH<sub>2</sub>Cl<sub>2</sub> at 0 °C, while, esters were hydrolyzed with aq. 4N NaOH (4 mL/1 mmol) at 0 °C-room temperature. The synthesis of oligomers involved coupling of monomers in the requisite sequence using standard coupling reagents EDCI, HOBt and DIPEA in CH<sub>2</sub>Cl<sub>2</sub>. The compounds reported were purified by column chromatography over silica gel (60-120 mesh).

Solvents were dried over standard drying agents and freshly distilled prior to use. Organic solutions were dried over anhydrous Na<sub>2</sub>SO<sub>4</sub> and concentrated in *vacuo*. Melting points were determined in open capillaries and were not corrected. Optical rotations were measured in CHCl<sub>3</sub> solutions on a Perkin-Elmer 343 polarimeter at room temperature using a cell of 1 dm of length and  $\lambda = 598$  nm. IR spectra were recorded with an FT-IR spectrometer between 400 and 4000 cm<sup>-1</sup> in KBr pellets. Mass spectra were obtained under high resolution mass spectrometry (HRMS) on Q-STAR-XL (Applied Biosystems).

### Synthesis of peptides **3b** and **4b**; **5a** and **5b**

The peptides **5a** and **5b** were prepared from monomers **1**, and **2a**. Accordingly, coupling of acid **8** with the amine **2a** (prepared by the reaction of **7b** with hydrazine hydrate in CH<sub>3</sub>OH at room temperature for 2 h) in the presence of EDCI and HOBt in CH<sub>2</sub>Cl<sub>2</sub> at room temperature for 5 h furnished the dipeptide **13** in 66.29% yield,  $[\alpha]_D = -69.54$  (*c* 1.07, CHCl<sub>3</sub>). Base (aq. 4N NaOH) hydrolysis of dipeptide **13** gave the acid **14**,

while **13** was converted into the corresponding amine salt **15** on exposure to  $\text{CF}_3\text{COOH}$  in  $\text{CH}_2\text{Cl}_2$  for 2 h. The thus derived acid **14** was then coupled with amine **15** in the presence of EDCI, HOBT and DIPEA in  $\text{CH}_2\text{Cl}_2$  for 5 h to furnish the tetrapeptide **5a** in 53.12% yield,  $[\alpha]_{\text{D}} = -19.89$  (*c* 1.25,  $\text{CHCl}_3$ ). Base hydrolysis of the ester group in **5a** with NaOH in  $\text{CH}_3\text{OH}$  gave the corresponding acid **16** (90.27%), which on coupling with the dipeptide amine TFA salt **15** under the above reaction conditions afforded the hexapeptide **5b** in 35.4% yield,  $[\alpha]_{\text{D}} = -1.85$  (*c* 0.09,  $\text{CHCl}_3$ ).

The peptides **3b** and **4b** were prepared from monomers **1a** and **2**. Accordingly, ester **1a** was subjected to hydrolysis with aq. 4N NaOH at room temperature to afford the acid **17** in 98.5% yield. Coupling of acid **17** with the amine **2** (prepared by the reaction of **7a** with hydrazine hydrate in  $\text{CH}_3\text{OH}$  at room temperature for 2 h) in the presence of EDCI and HOBT in  $\text{CH}_2\text{Cl}_2$  at room temperature for 5 h furnished the dipeptide **18** in 58.59% yield,  $[\alpha]_{\text{D}} = +38.15$  (*c* 0.065,  $\text{CHCl}_3$ ). Base (aq. 4N NaOH) hydrolysis of dipeptide **18** gave the acid **19**, while **18** was converted into the corresponding amine salt **20** on exposure to  $\text{CF}_3\text{COOH}$  in  $\text{CH}_2\text{Cl}_2$  for 2 h. The thus derived acid **19** was then coupled with amine **20** in the presence of EDCI, HOBT and DIPEA in  $\text{CH}_2\text{Cl}_2$  for 5 h to furnish the tetrapeptide **3b** in 48.21% yield,  $[\alpha]_{\text{D}} = +246.7$  (*c* 1.04,  $\text{CHCl}_3$ ). Tetrapeptide **3b** was converted into the corresponding amine salt **21** on exposure to  $\text{CF}_3\text{COOH}$  in  $\text{CH}_2\text{Cl}_2$  for 2 h. Coupling of acid **19** salt **21** under the above reaction conditions afforded the hexapeptide **4b** in 24.1% yield,  $[\alpha]_{\text{D}} = +249.55$  (*c* 0.13,  $\text{CHCl}_3$ ).

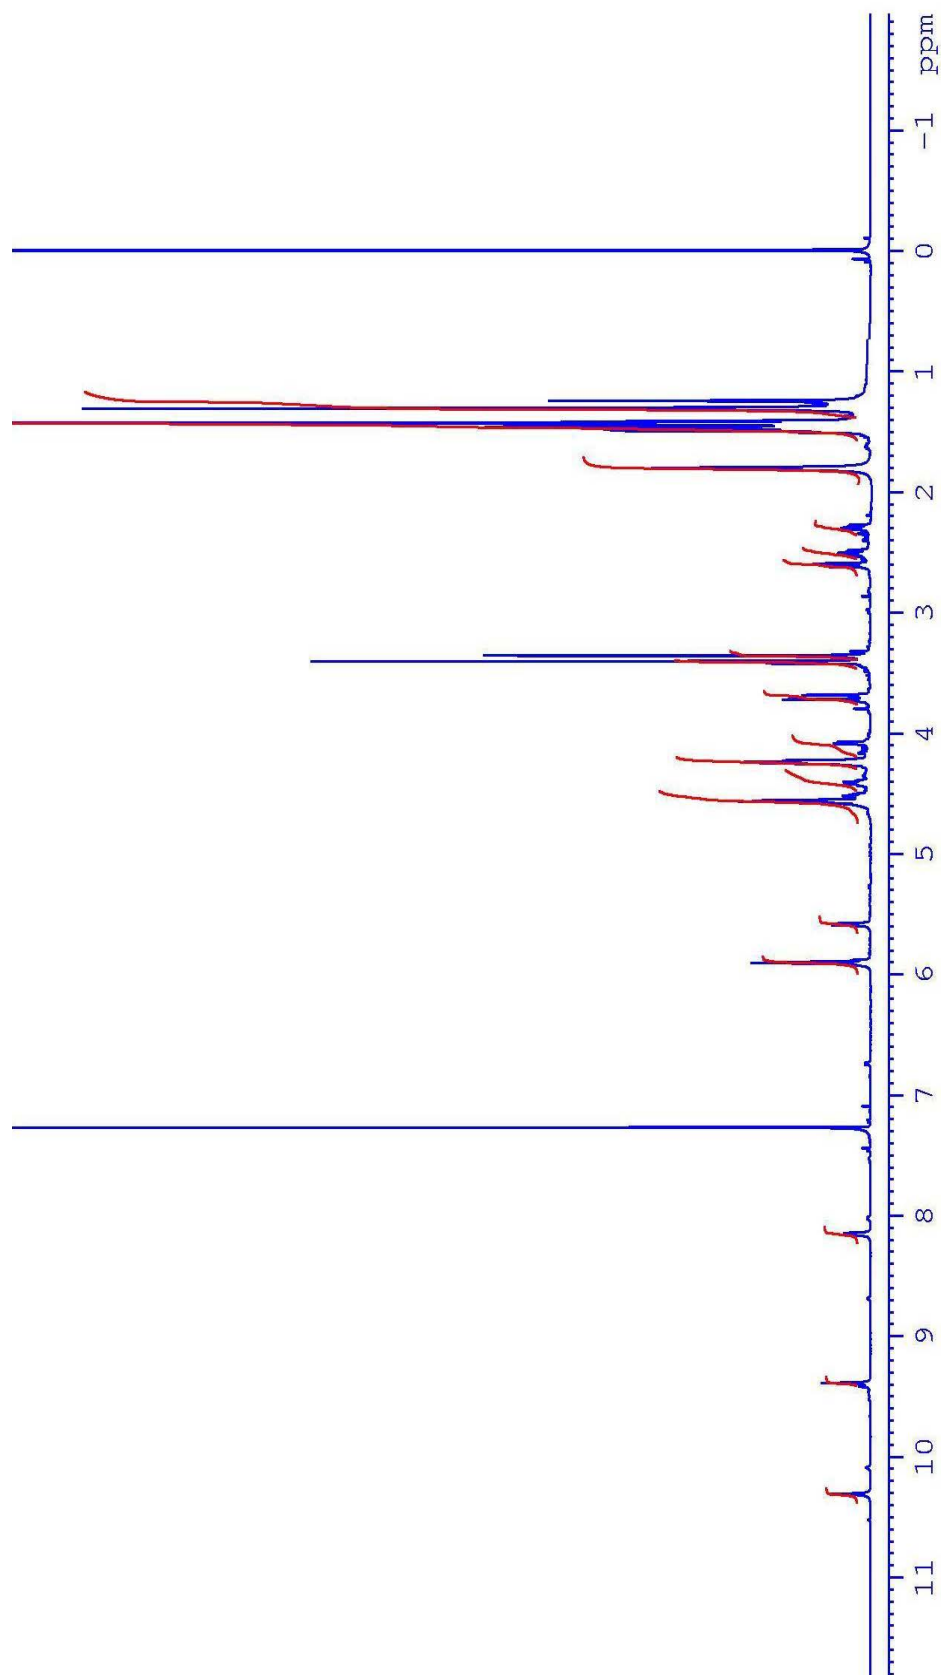

Supporting Figure 1.  $^1\text{H}$  NMR spectrum of peptide 3a (600 MHz,  $\text{CDCl}_3$ , 278 K)

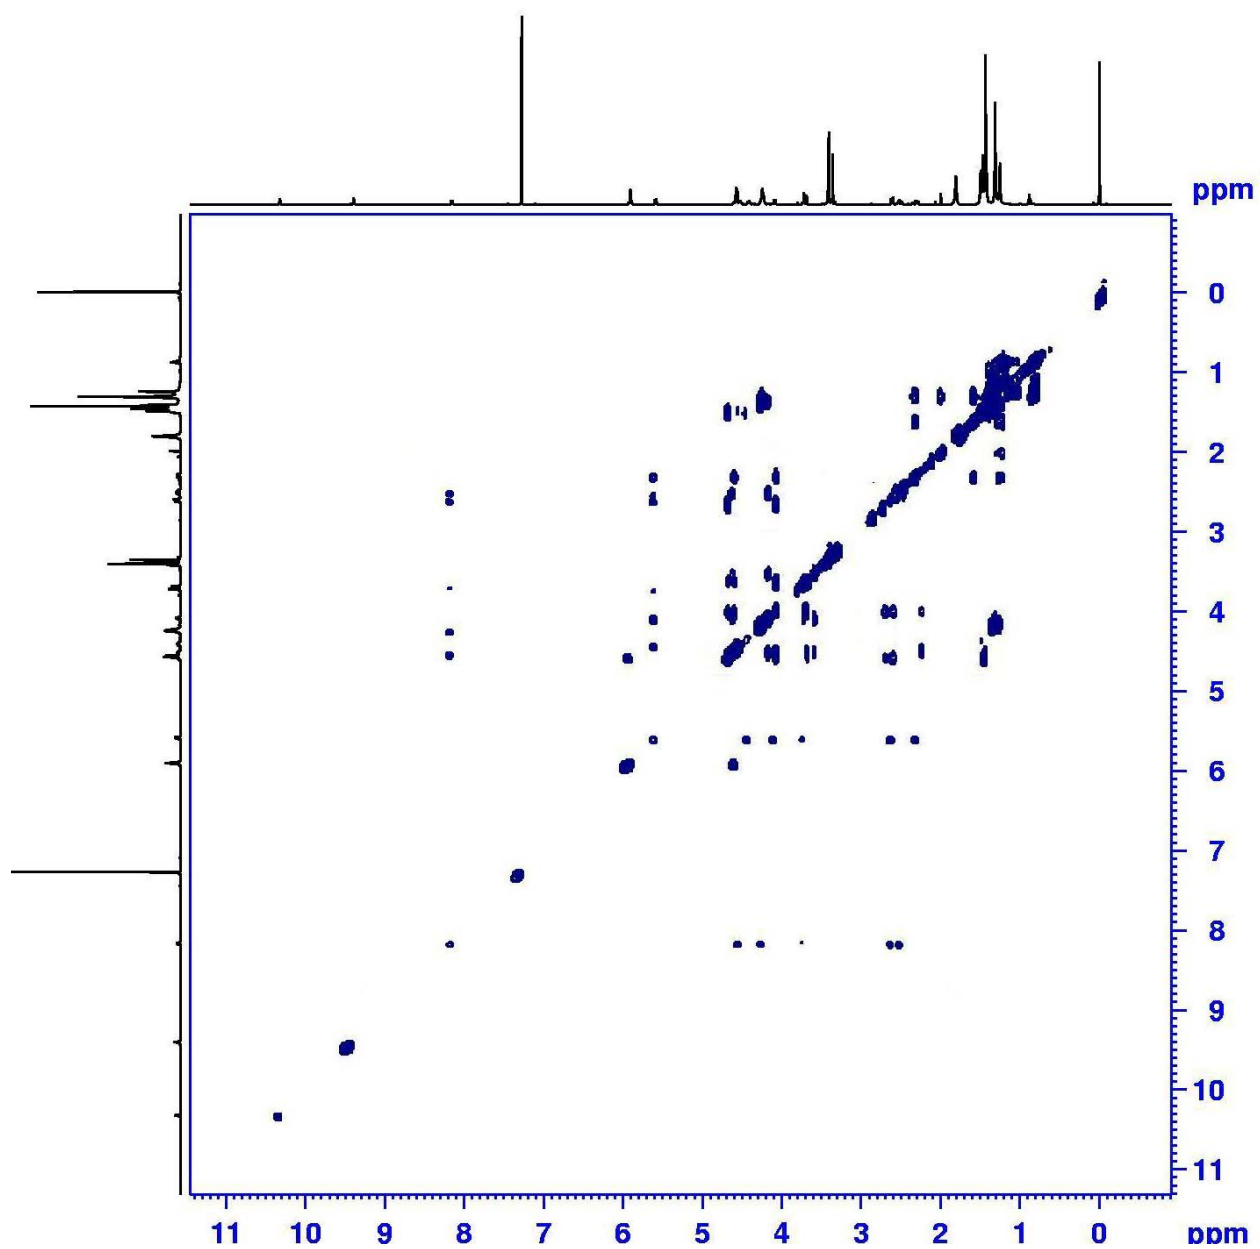

Supporting Figure 2. TOCSY spectrum of peptide 3a (600 MHz,  $\text{CDCl}_3$ , 278 K)

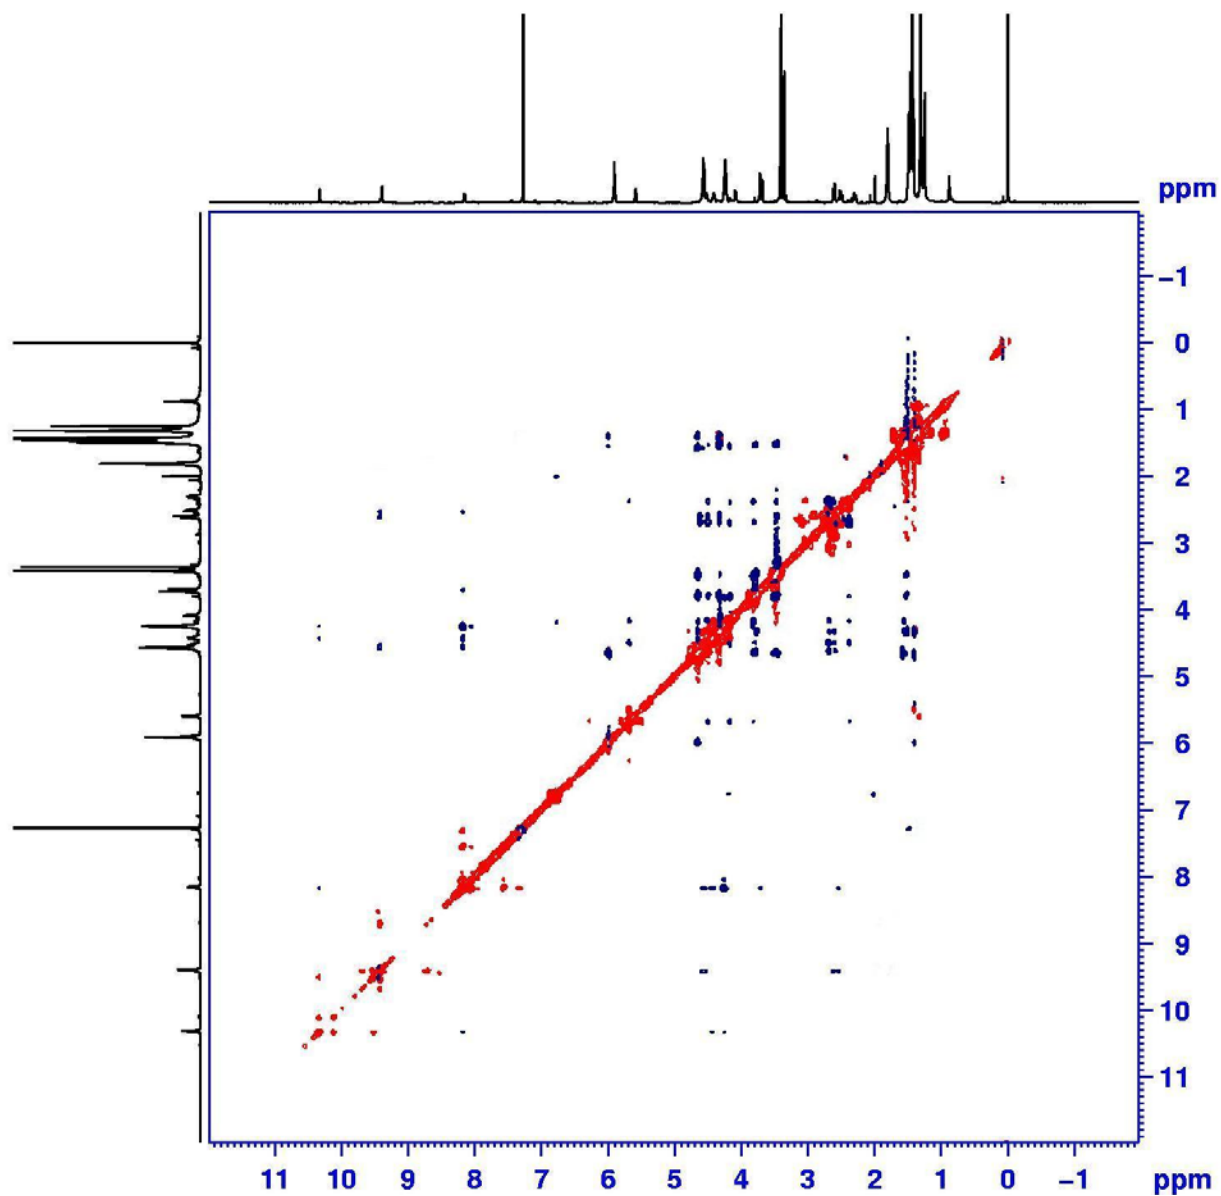

Supporting Figure 3. ROESY spectrum of peptide 3a (600 MHz, CDCl<sub>3</sub>, 278 K)



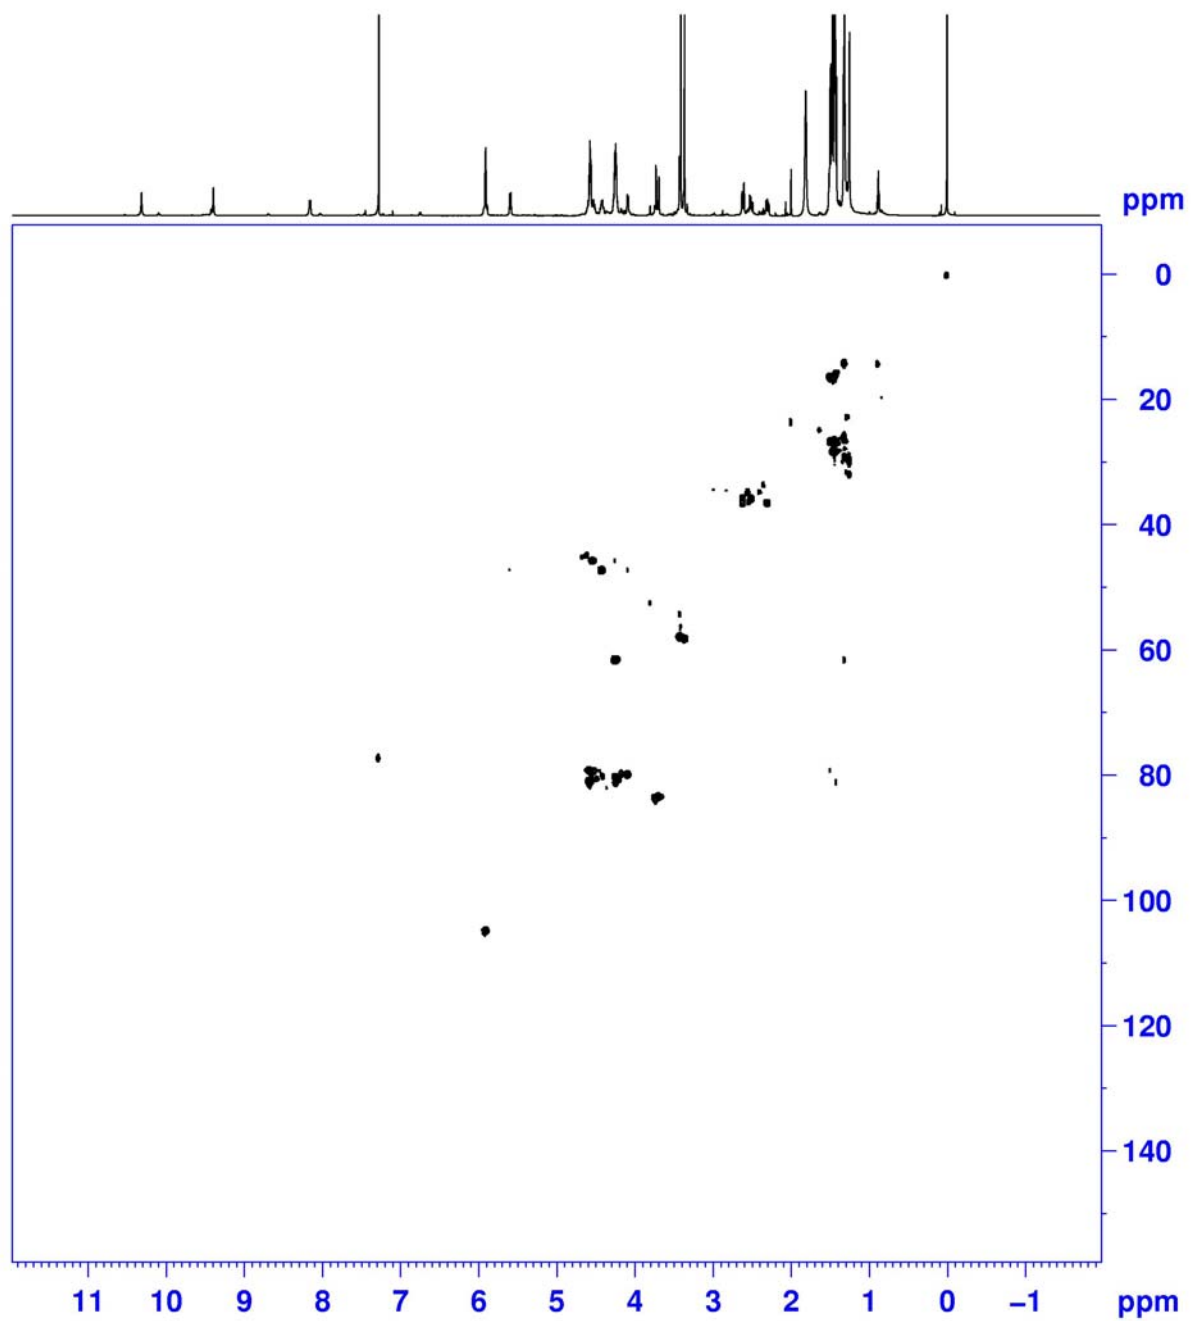

**Supporting Figure 4. HSQC spectrum of peptide 3a (600 MHz,  $\text{CDCl}_3$ , 278 K)**

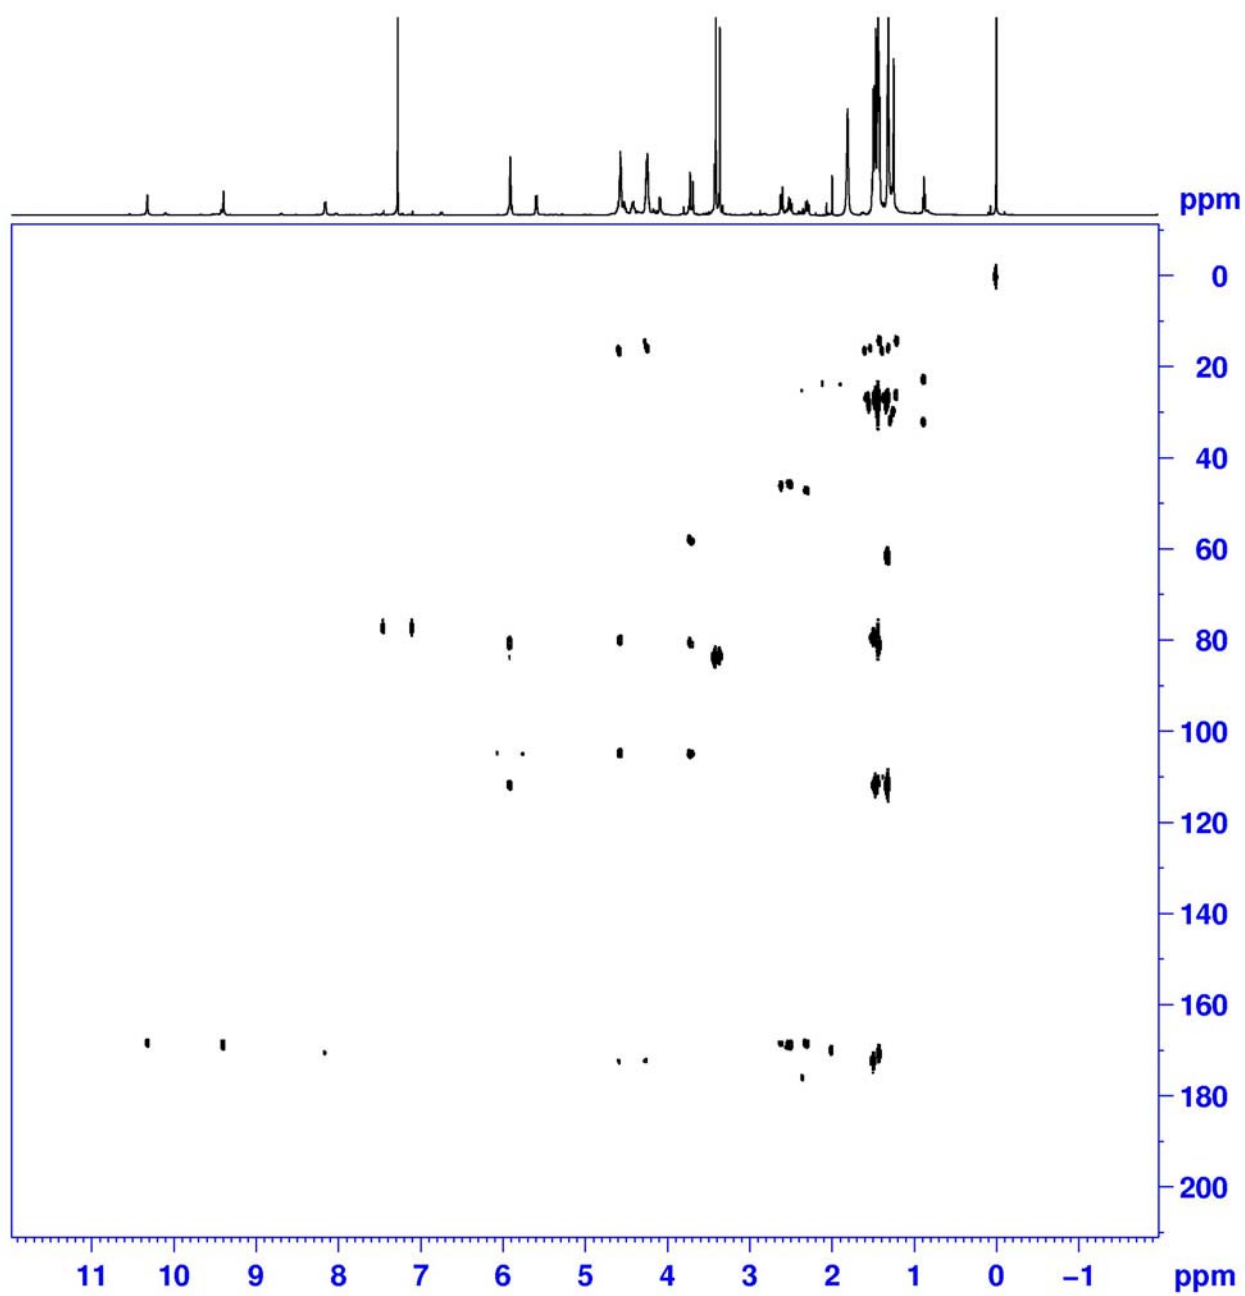

**Supporting Figure 5. HMBC spectrum of peptide 3a (600 MHz,  $\text{CDCl}_3$ , 278 K)**

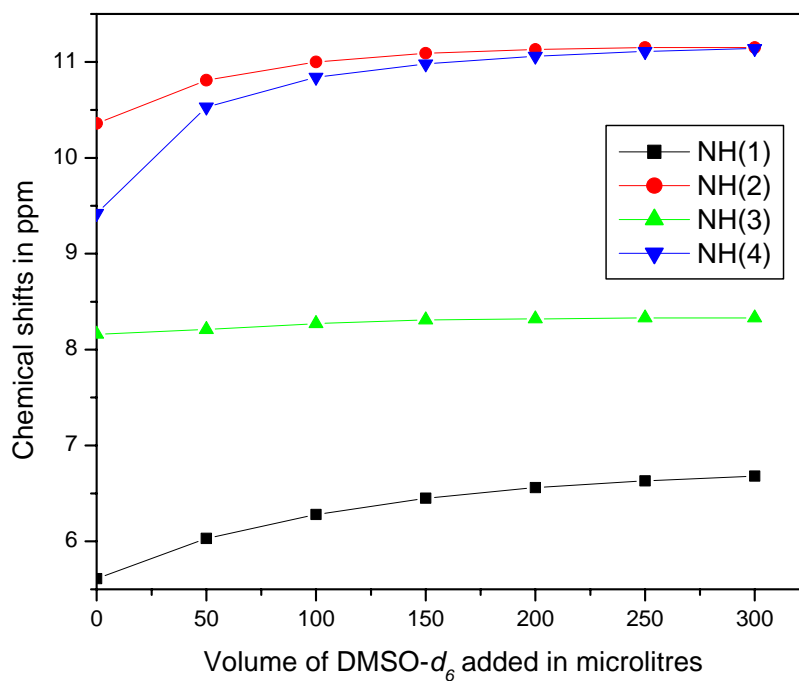

**Supporting Figure 6. Solvent titration plot for peptide 3a**

| Residue | Atom | Residue | Atom                 | Lower bond (Å) | Higher bond (Å) |
|---------|------|---------|----------------------|----------------|-----------------|
| 1       | NH   | 1       | CaH ( <i>pro-R</i> ) | 2.52           | 3.08            |
| 1       | CβH  | 2       | NH                   | 3.15           | 3.84            |
| 1       | CβH  | 3       | NH                   | 2.55           | 3.12            |
| 1       | CβH  | 3       | CaH ( <i>pro-R</i> ) | 2.34           | 2.85            |
| 2       | NH   | 1       | CaH ( <i>pro-S</i> ) | 2.38           | 2.91            |
| 2       | NH   | 2       | CaH                  | 2.96           | 3.61            |
| 2       | NH   | 3       | NH                   | 2.88           | 3.53            |
| 3       | NH   | 2       | CaH                  | 2.16           | 2.63            |
| 3       | NH   | 3       | CaH ( <i>pro-R</i> ) | 2.61           | 3.20            |
| 3       | CβH  | 4       | NH                   | 2.95           | 3.61            |
| 4       | NH   | 3       | CaH ( <i>pro-S</i> ) | 2.72           | 3.32            |
| 4       | NH   | 4       | CaH                  | 2.88           | 3.53            |

**Supporting Table 1. Distance constraints used in MD calculations for peptide 3a, derived from ROESY experiment in CDCl<sub>3</sub> (600 MHz, 278 K)**

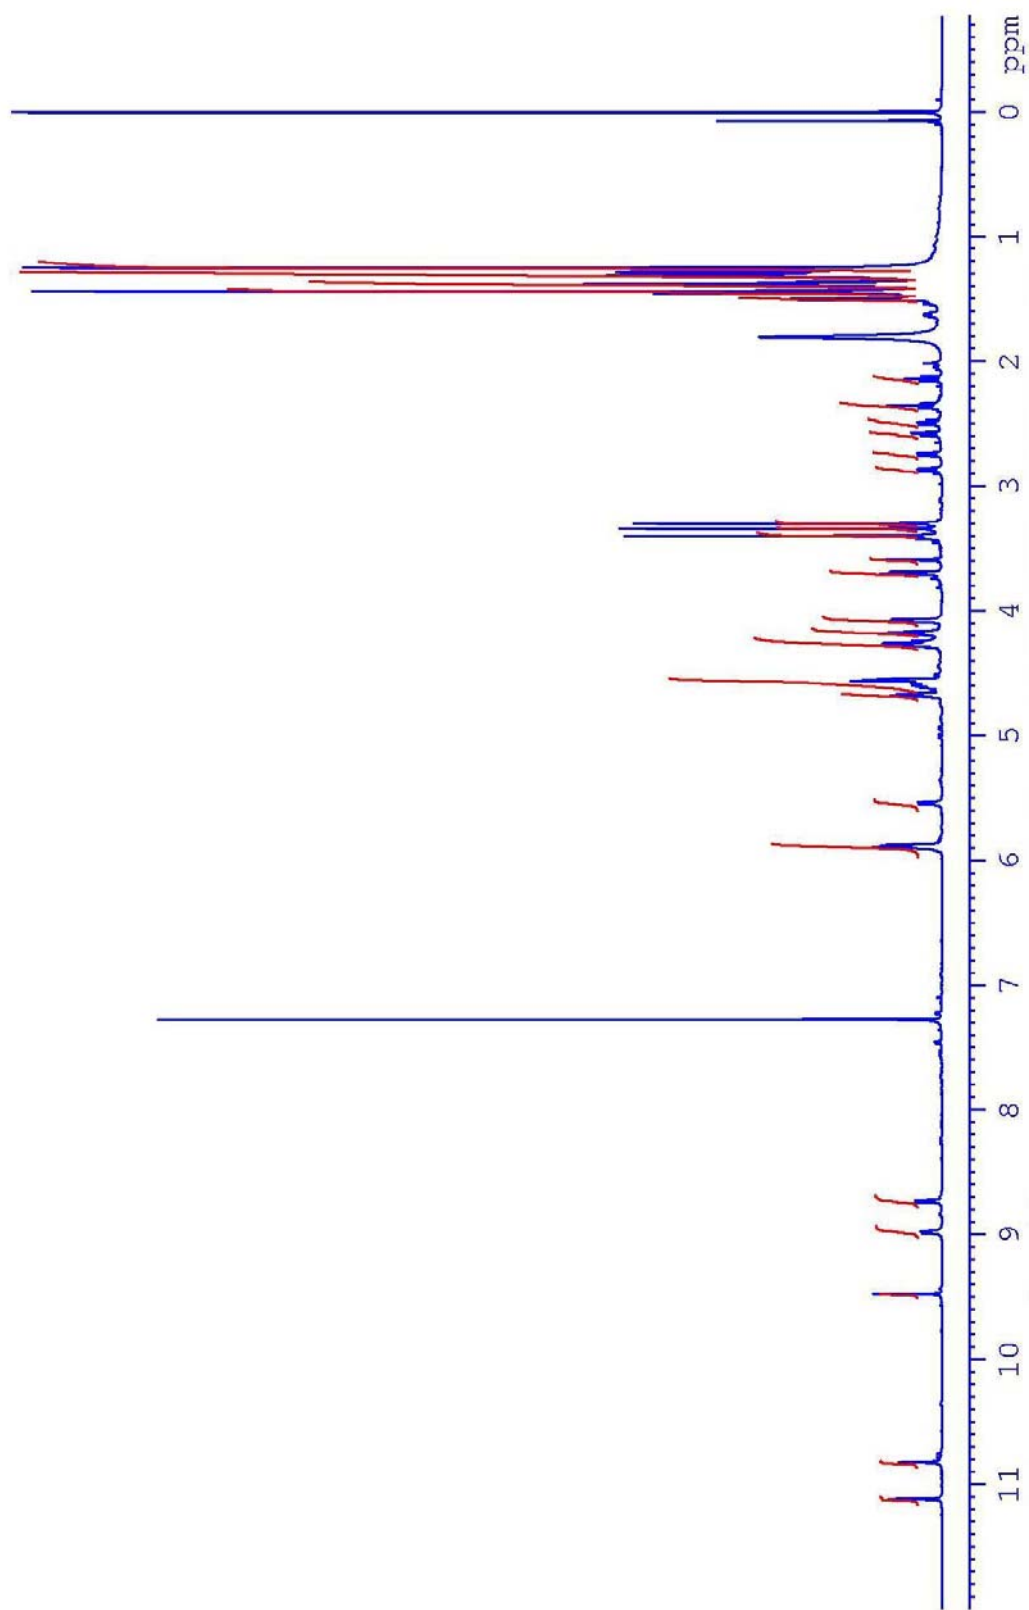

Supporting Figure 7.  $^1\text{H}$  NMR spectrum of peptide 4a (600 MHz,  $\text{CDCl}_3$ , 278K)

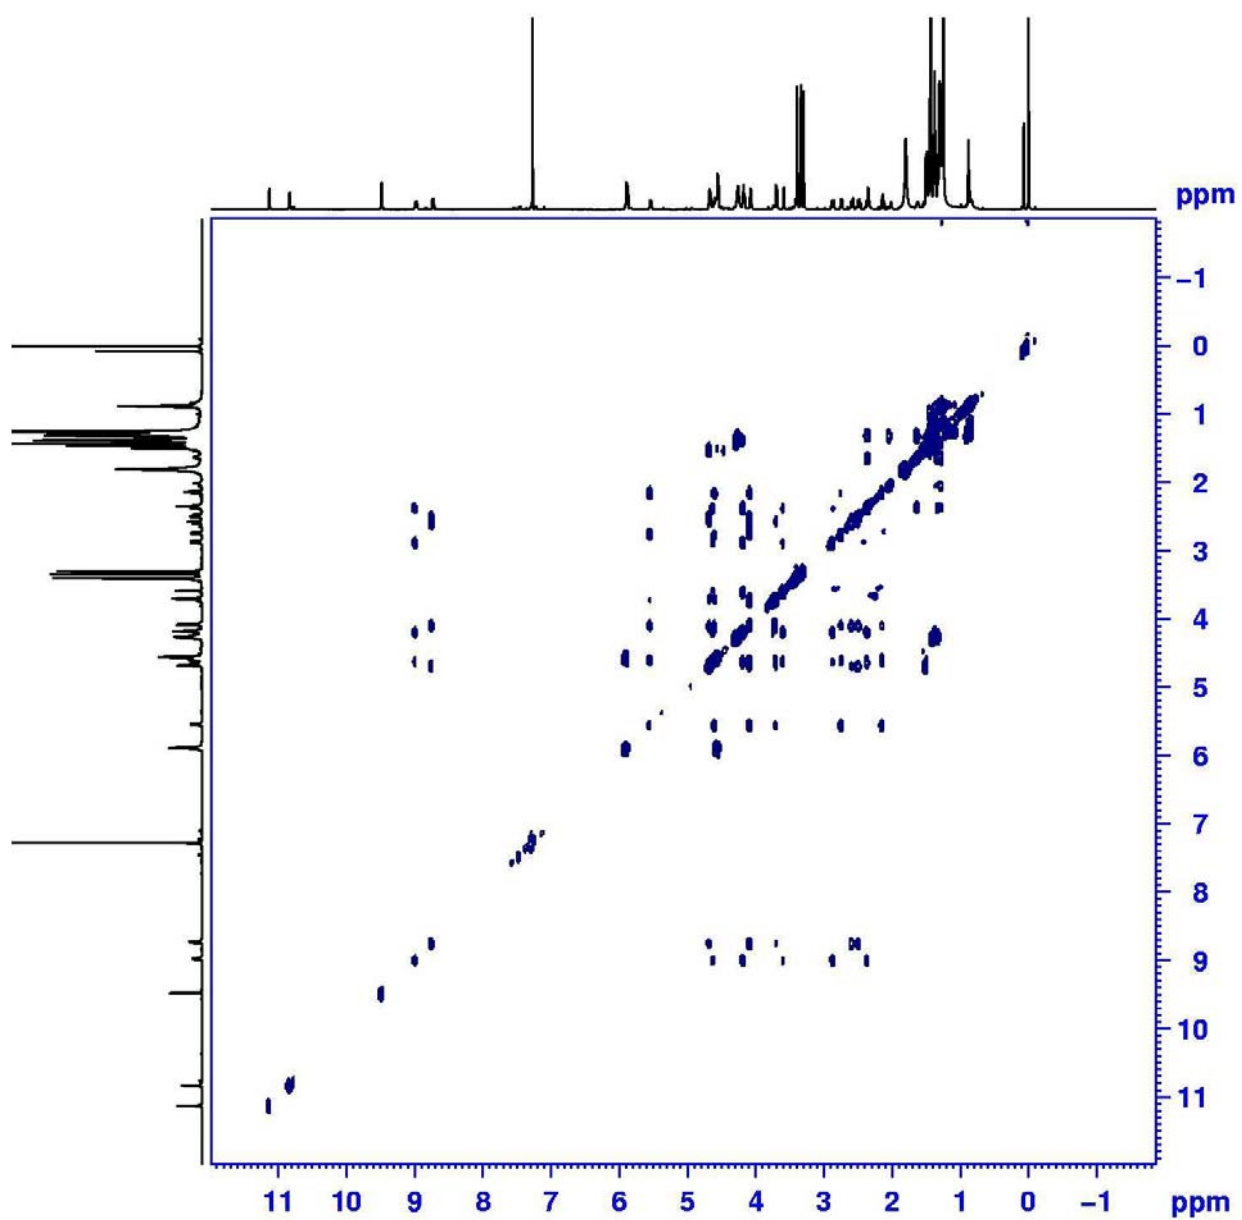

Supporting Figure 8. TOCSY spectrum of peptide 4a (600 MHz, CDCl<sub>3</sub>, 278 K)

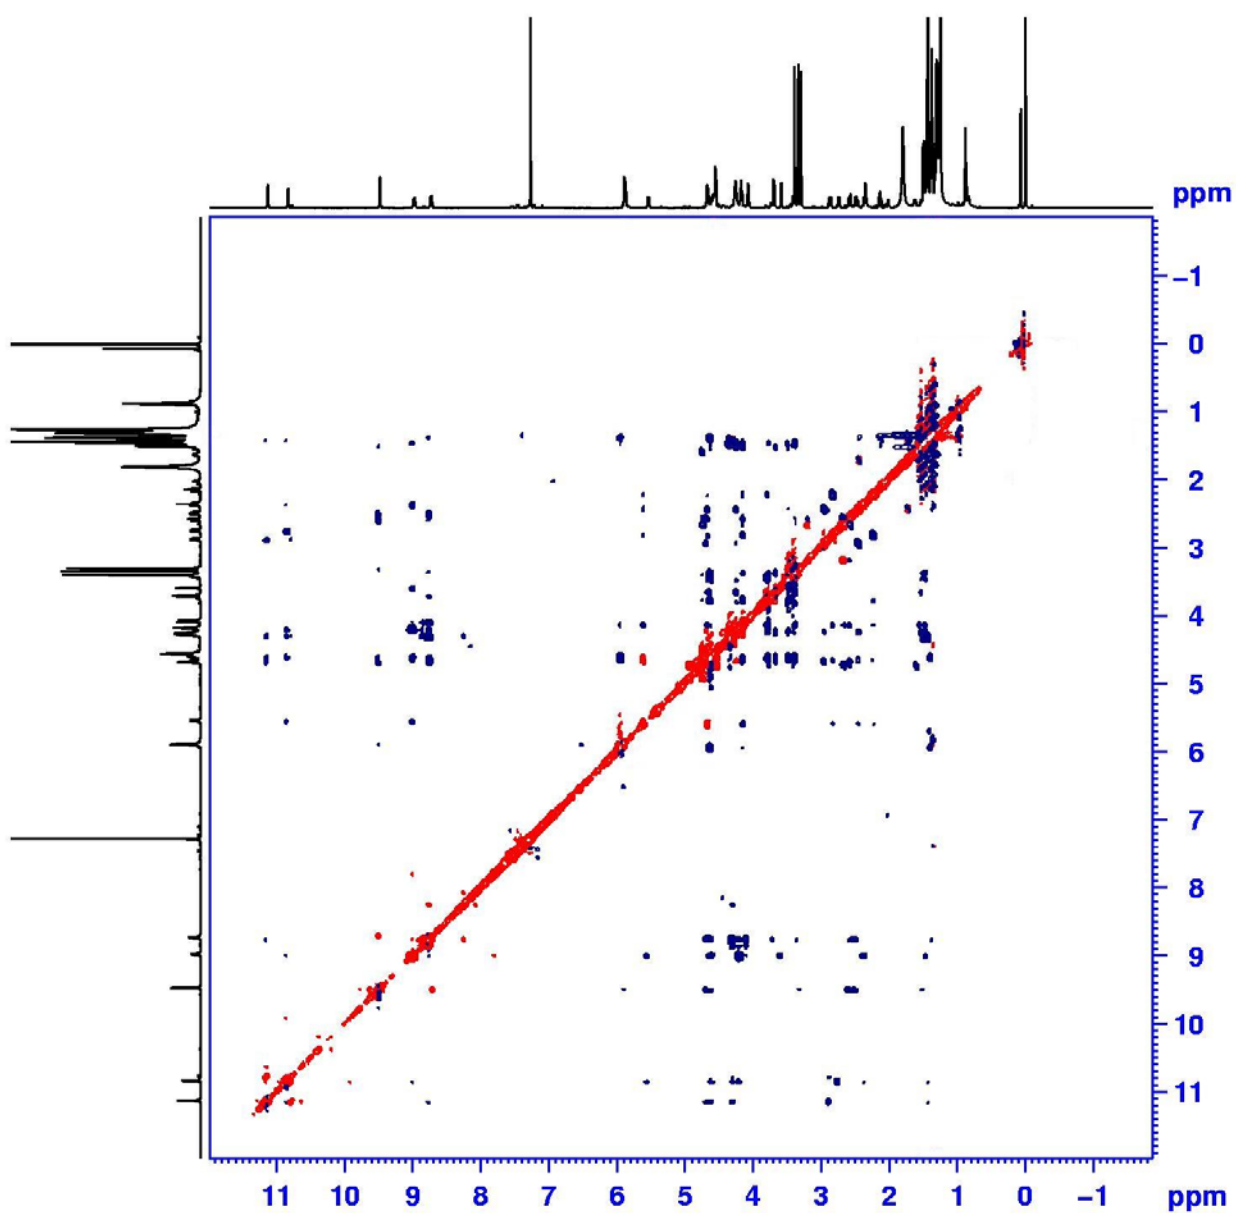

Supporting Figure 9. ROESY spectrum of peptide 4a (600 MHz, CDCl<sub>3</sub>, 278 K)

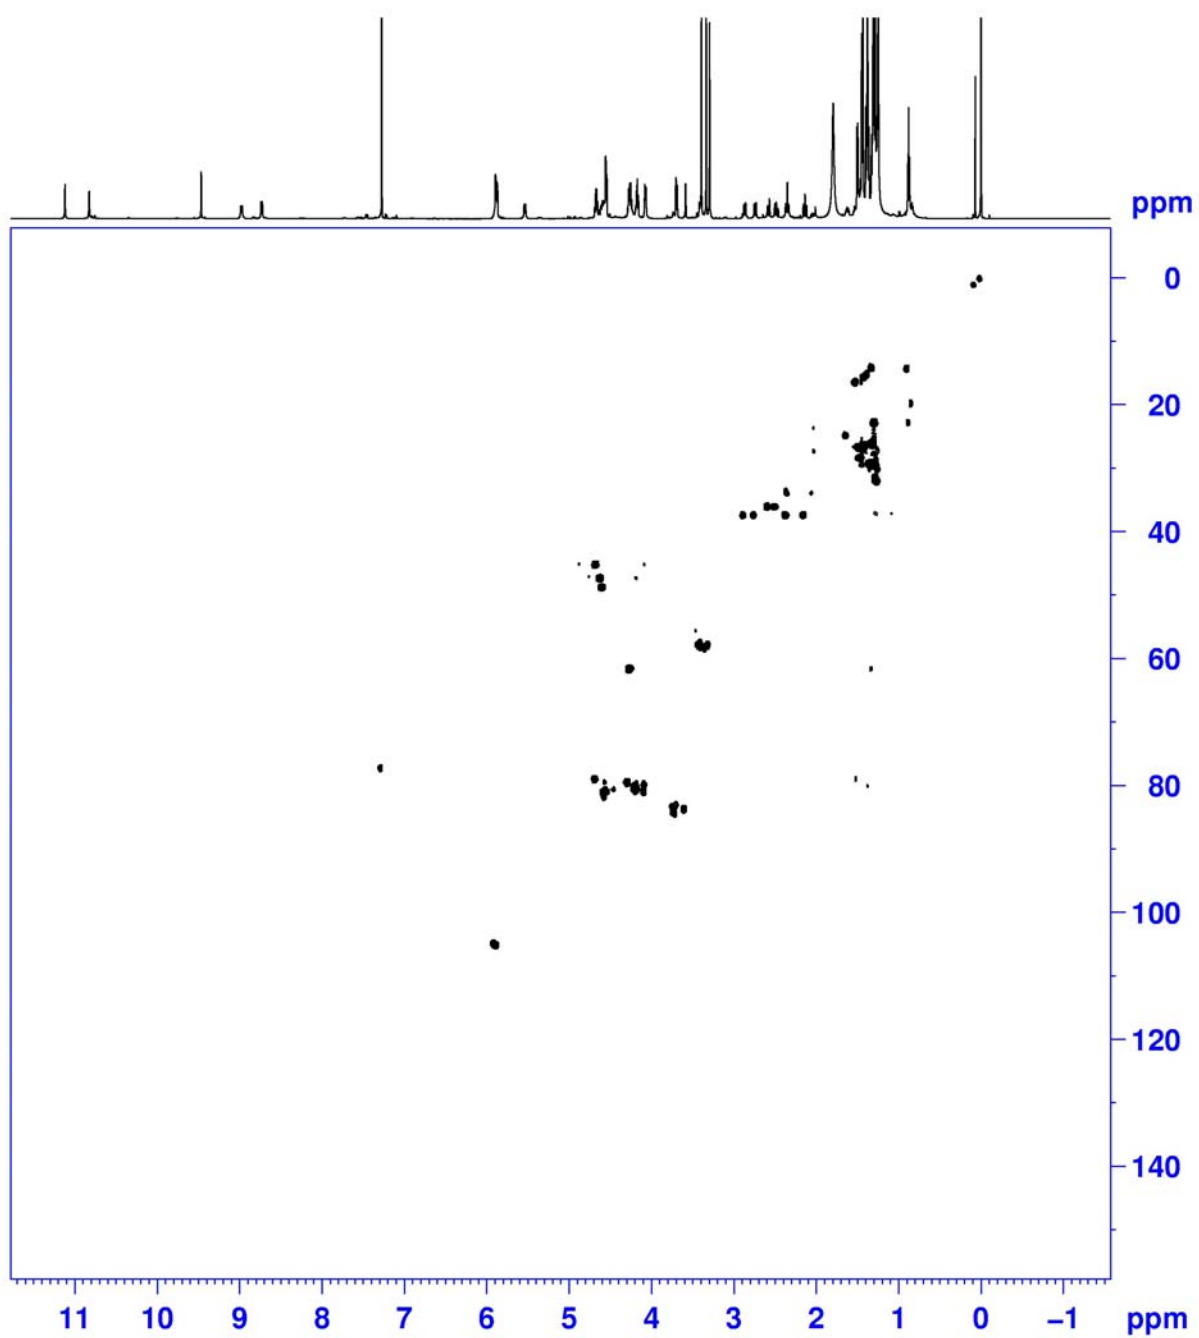

**Supporting Figure 10. HSQC spectrum of peptide 4a (600 MHz,  $\text{CDCl}_3$ , 278 K)**

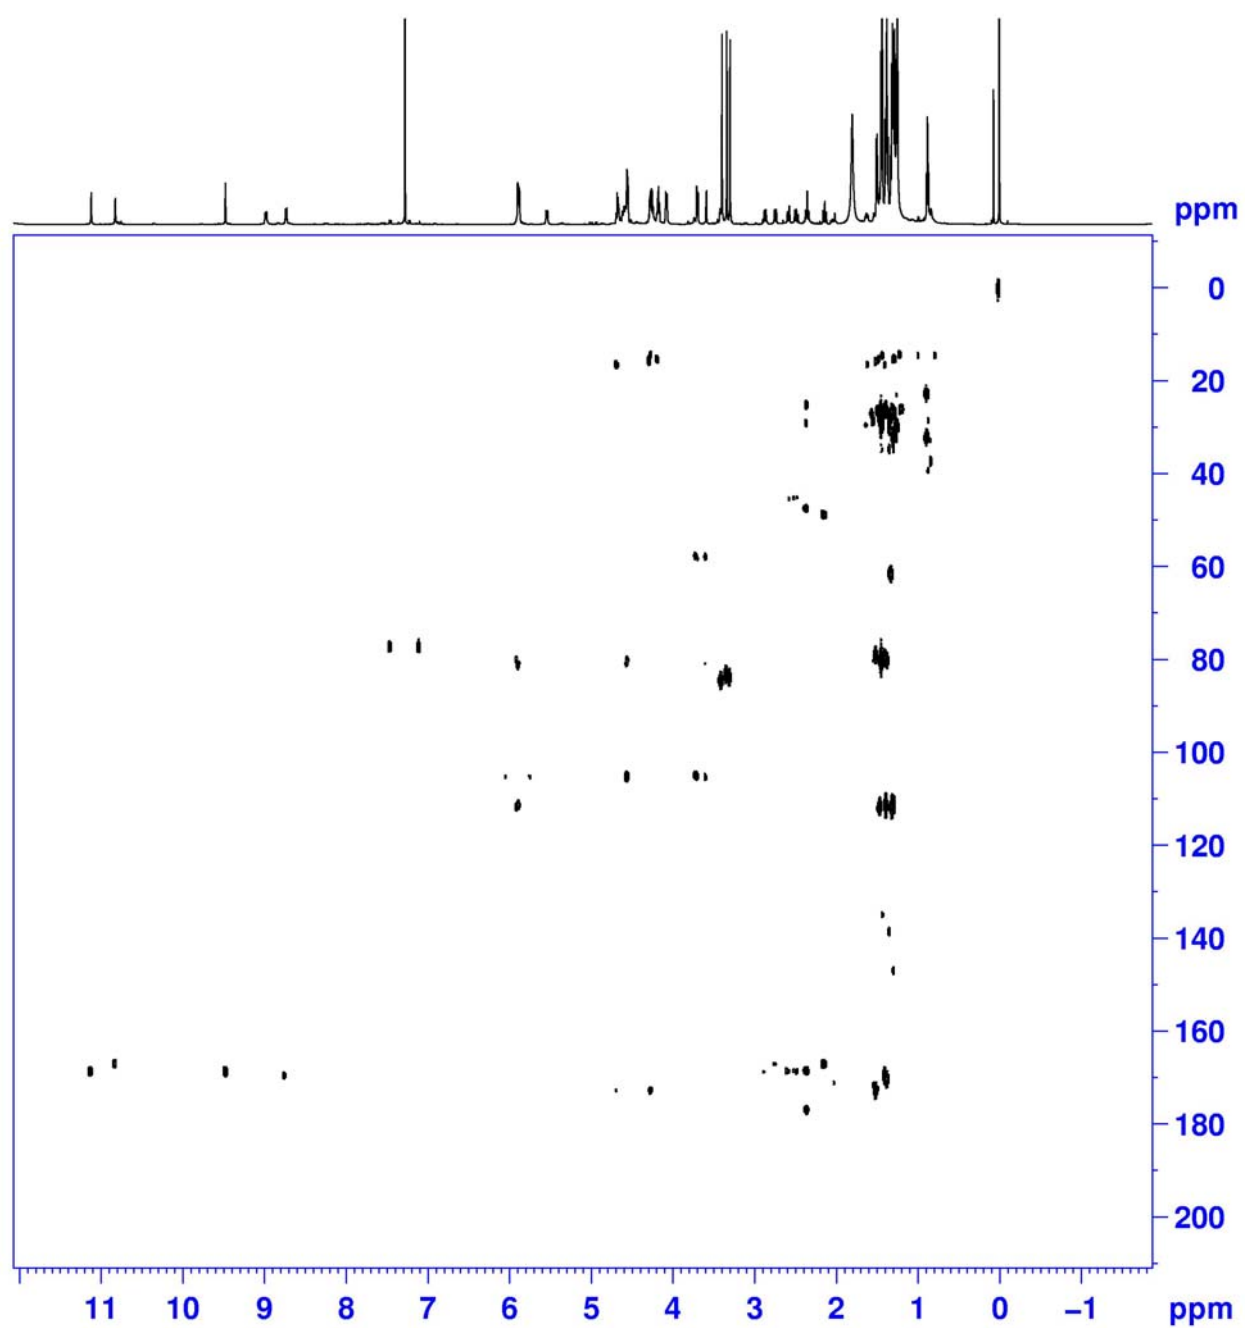

Supporting Figure 11. HMBC spectrum of peptide 4a (600 MHz,  $\text{CDCl}_3$ , 278 K)



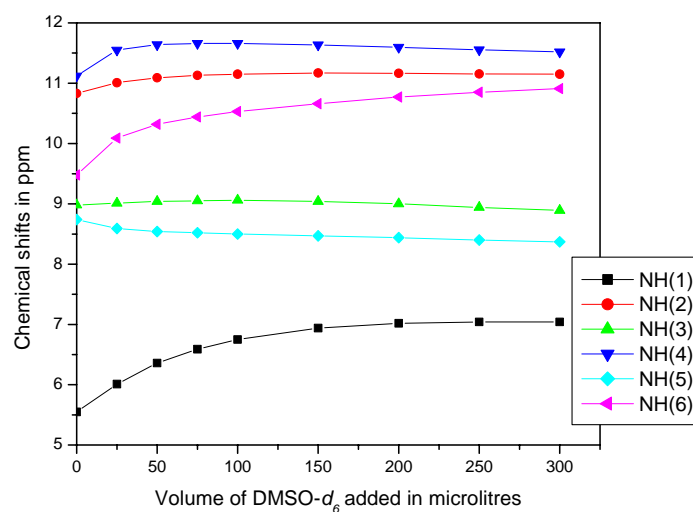

**Supporting Figure 12. Solvent titration plot for peptide 4a**

| Residue | Atom | Residue | Atom                 | Lower bond (Å) | Higher bond (Å) |
|---------|------|---------|----------------------|----------------|-----------------|
| 1       | NH   | 1       | CaH ( <i>pro-R</i> ) | 2.45           | 3.00            |
| 1       | CβH  | 2       | NH                   | 2.70           | 3.31            |
| 1       | CβH  | 3       | NH                   | 2.36           | 2.88            |
| 1       | CβH  | 3       | CaH ( <i>pro-R</i> ) | 2.18           | 2.66            |
| 2       | NH   | 1       | CaH ( <i>pro-S</i> ) | 2.38           | 2.91            |
| 2       | NH   | 2       | CaH                  | 2.82           | 3.44            |
| 2       | NH   | 3       | NH                   | 3.30           | 4.03            |
| 2       | NH   | 4       | CaH                  | 2.84           | 3.47            |
| 3       | NH   | 2       | CaH                  | 1.90           | 2.32            |
| 3       | NH   | 3       | CaH ( <i>pro-R</i> ) | 2.61           | 3.19            |
| 3       | CβH  | 4       | NH                   | 2.60           | 3.18            |
| 3       | CβH  | 5       | NH                   | 2.37           | 2.89            |
| 3       | CβH  | 5       | CaH ( <i>pro-R</i> ) | 2.17           | 2.65            |
| 4       | NH   | 3       | CaH ( <i>pro-S</i> ) | 2.27           | 2.77            |
| 4       | NH   | 4       | CaH                  | 2.80           | 3.42            |
| 4       | NH   | 5       | NH                   | 3.23           | 3.95            |
| 4       | NH   | 6       | CaH                  | 3.86           | 4.72            |
| 5       | NH   | 4       | CaH                  | 1.90           | 2.32            |
| 5       | NH   | 5       | CaH ( <i>pro-R</i> ) | 2.59           | 3.18            |
| 5       | CβH  | 6       | NH                   | 2.74           | 3.35            |
| 6       | NH   | 5       | CaH ( <i>pro-S</i> ) | 2.34           | 2.86            |
| 6       | NH   | 6       | CaH                  | 2.31           | 2.83            |

**Supporting Table 2. Distance constraints used in MD calculations for peptide 4a, derived from ROESY experiment in CDCl<sub>3</sub> (600 MHz, 278 K)**

| Residue<br>Protons | Res-1                                                                        | Res-2                    | Res-3                                         | Res-4                    |
|--------------------|------------------------------------------------------------------------------|--------------------------|-----------------------------------------------|--------------------------|
| NH                 | 5.72<br>(d, $J = 9.2$ )                                                      | 10.39<br>(s)             | 8.29<br>(d, $J = 9.5$ )                       | 9.77<br>(s)              |
| C $\alpha$ H       | 2.60<br>(dd, $J = 3.6$ ,<br>15.0)                                            | 4.27<br>(d, $J = 15.6$ ) | 2.64<br>(dd, $J = 3.5$ ,<br>14.5)             | 4.46<br>(d, $J = 17.0$ ) |
| C $\alpha'$ H      | 2.47<br>(dd, $J = 8.4$ ,<br>15.0)                                            | 4.37<br>(d, $J = 15.6$ ) | 2.48<br>(dd, $J = 8.7$ ,<br>14.5)             | 4.50<br>(d, $J = 17.0$ ) |
| C $\beta$ H        | 4.35<br>(m)                                                                  | —                        | 4.65<br>(ddt, $J =$<br>3.5, 8.7, 9.5,<br>8.7) | —                        |
| C4H                | 4.15<br>(dd, $J = 3.1$ ,<br>8.0)                                             | —                        | 4.22<br>(m)                                   | —                        |
| C3H                | 3.74<br>(d, $J = 3.1$ )                                                      | —                        | 3.75<br>(d, $J = 3.0$ )                       | —                        |
| C2H                | 4.57<br>(d, $J = 3.8$ )                                                      | —                        | 4.58<br>(d, $J = 3.8$ )                       | —                        |
| C1H                | 5.89<br>(d, $J = 3.8$ )                                                      | —                        | 5.89<br>(d, $J = 3.8$ )                       | —                        |
| Acetonides:        | 1.47 (3H, s), 1.32 (3H, s), 1.31 (6H, 2s)                                    |                          |                                               |                          |
| OMe:               | 3.41(s), 3.39 (s)                                                            |                          |                                               |                          |
| Ethyl ester:       | 4.24 (2H, m, -CH <sub>2</sub> ), 1.30 (3H, t, $J = 7.0$ , -CH <sub>3</sub> ) |                          |                                               |                          |
| Boc:               | 1.44 (9H, s)                                                                 |                          |                                               |                          |

**Supporting Table 3. <sup>1</sup>H NMR chemical shifts  $\delta$  in ppm with multiplicity and coupling constants  $J$  in Hz (in parentheses) of 5a (600 MHz, CDCl<sub>3</sub>, 278 K)**

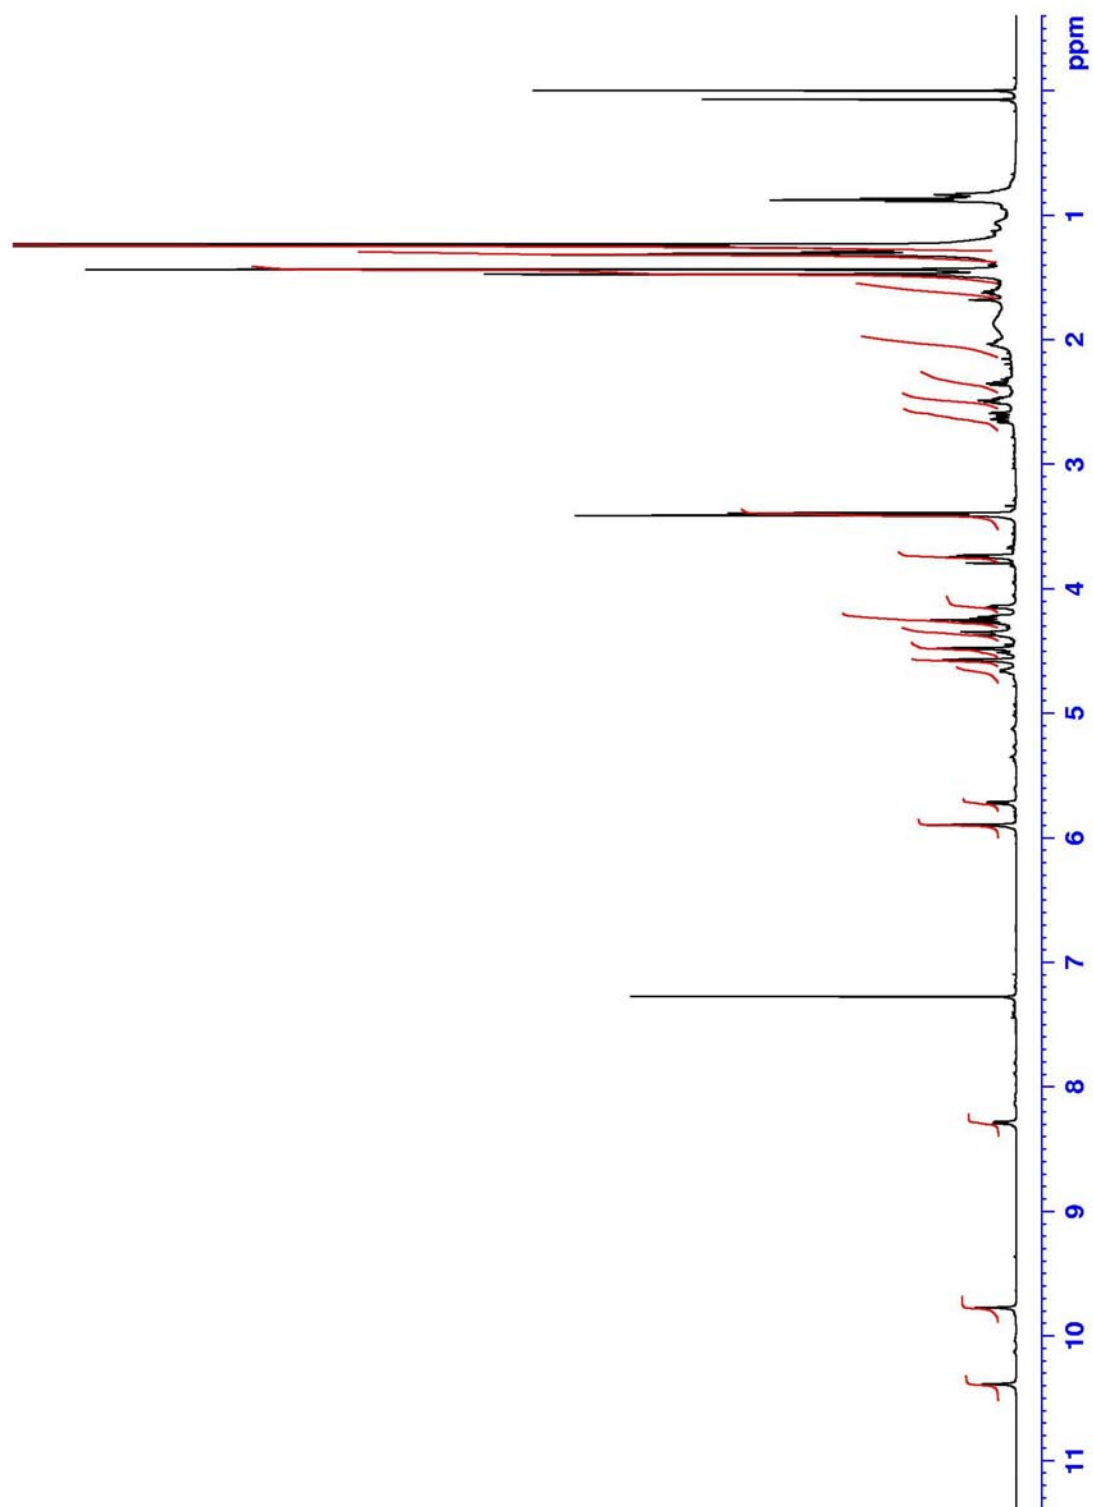

Supporting Figure 13.  $^1\text{H}$  NMR spectrum of 5a (600 MHz,  $\text{CDCl}_3$ , 278 K)

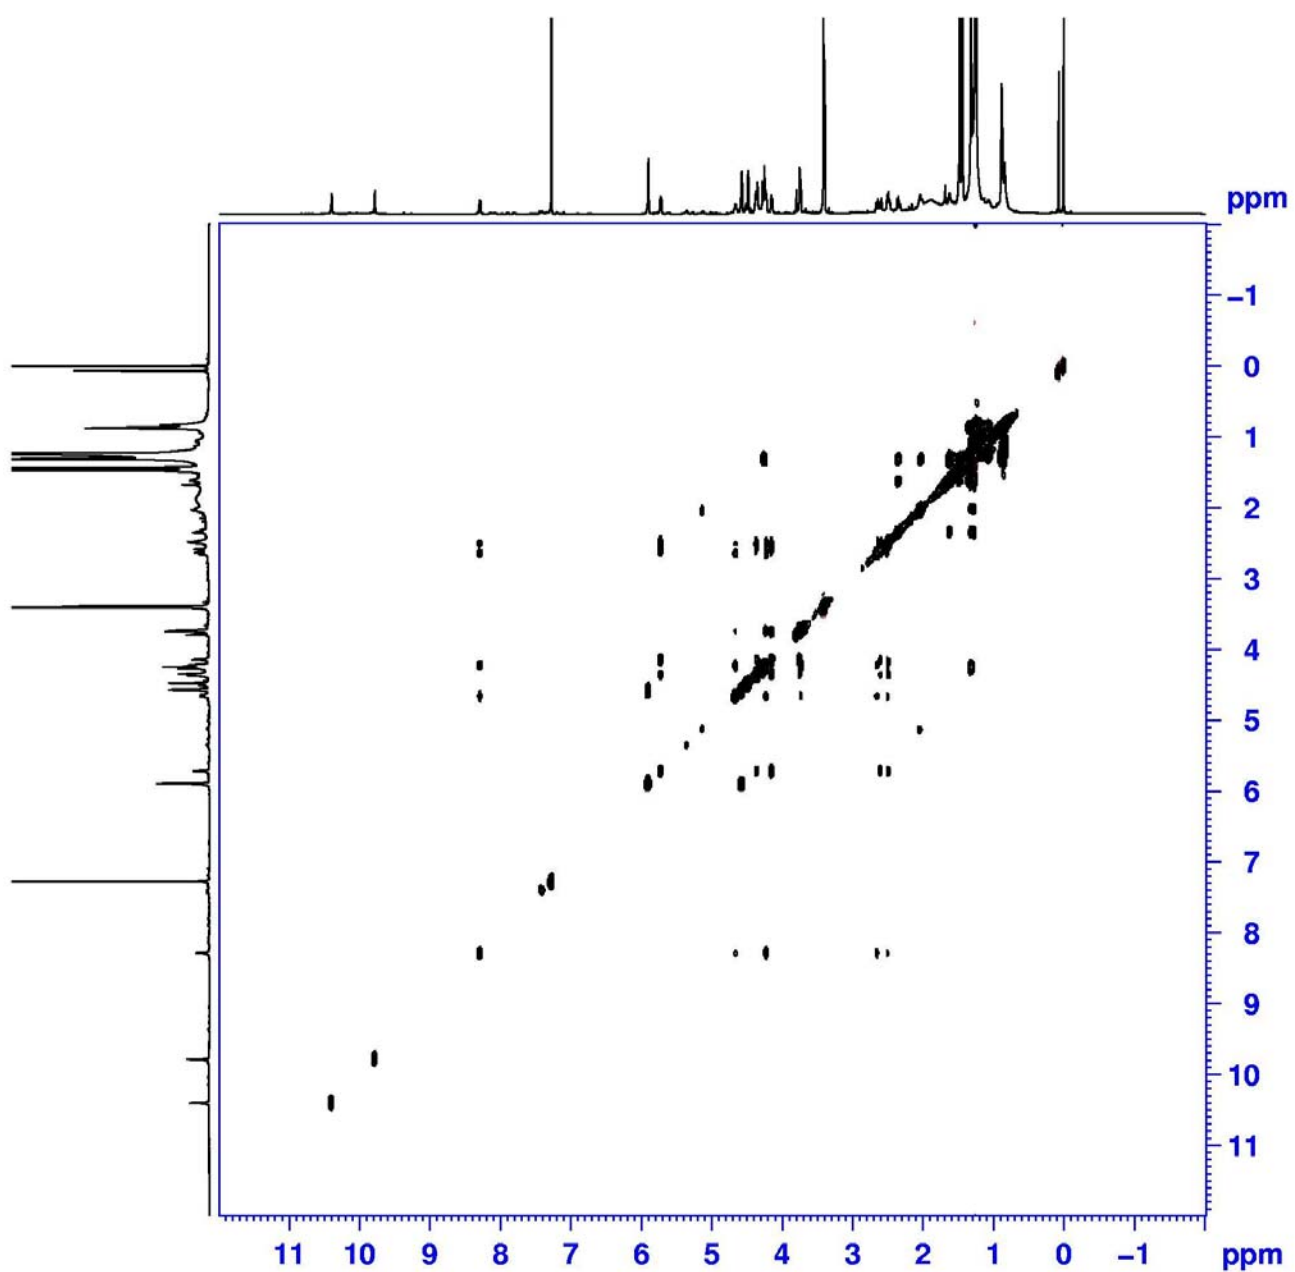

Supporting Figure 14. TOCSY spectrum of 5a (600 MHz, CDCl<sub>3</sub>, 278 K)

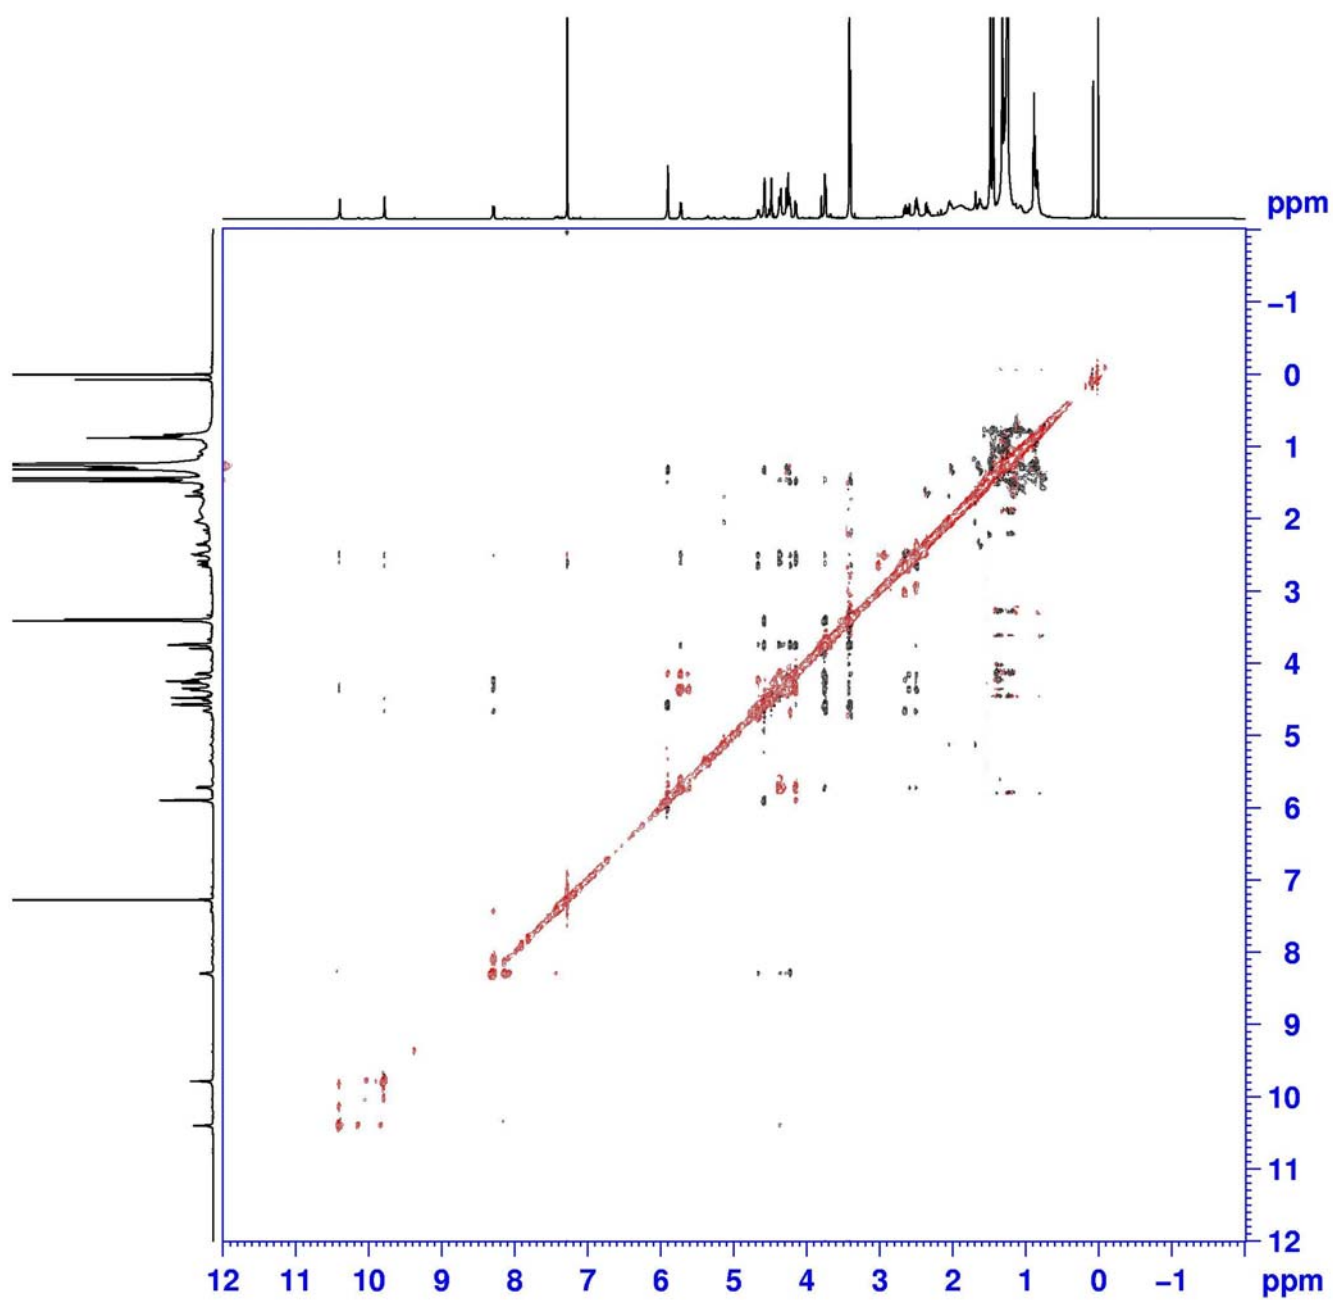

Supporting Figure 15. ROESY spectrum of 5a (600 MHz, CDCl<sub>3</sub>, 278 K)

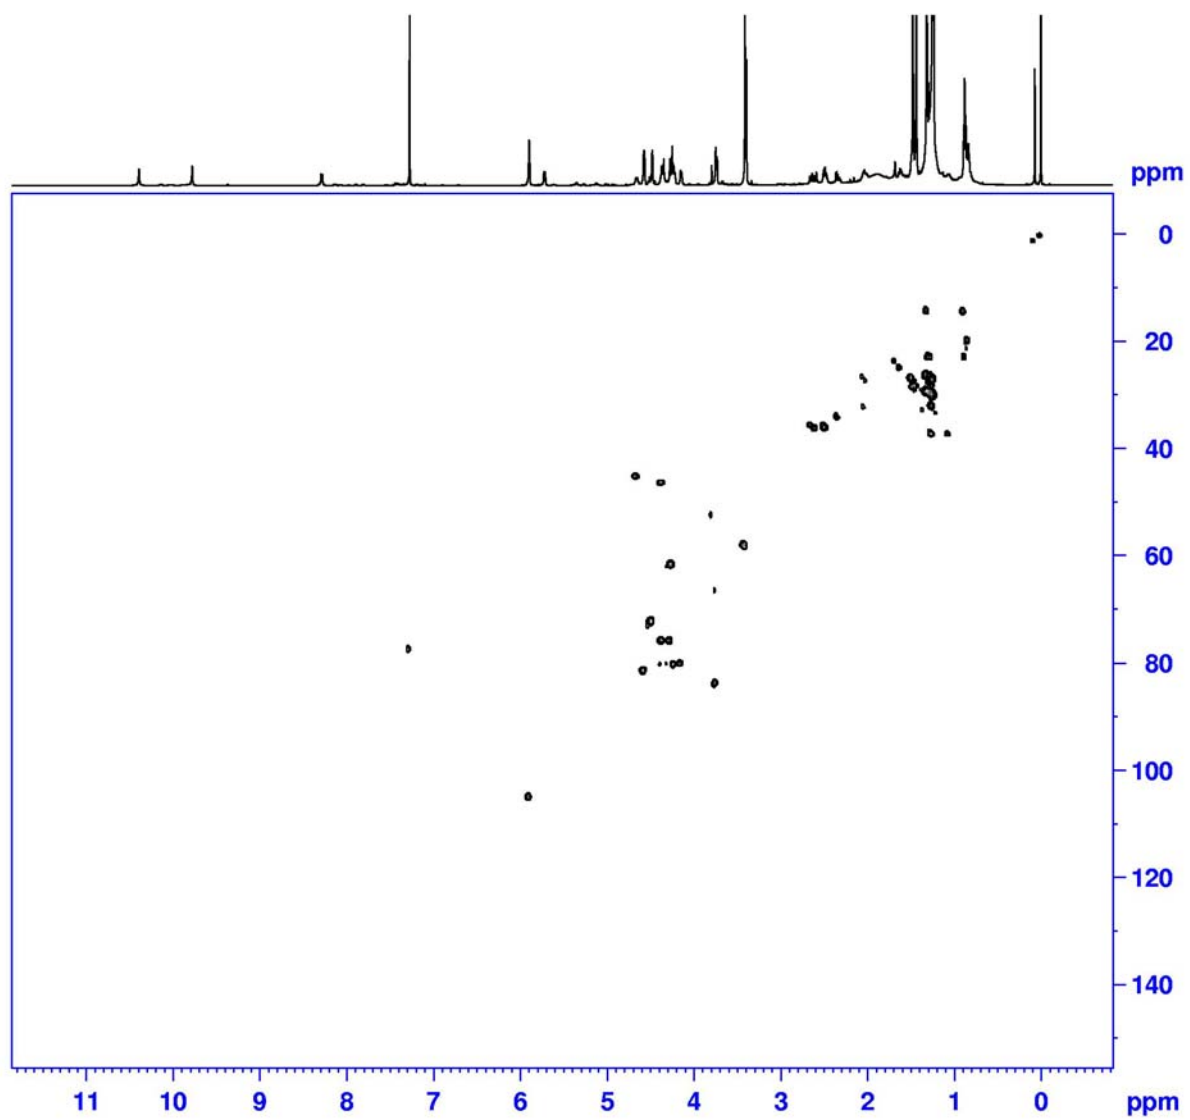

**Supporting Figure 16. HSQC spectrum of 5a (600 MHz,  $\text{CDCl}_3$ , 278 K)**

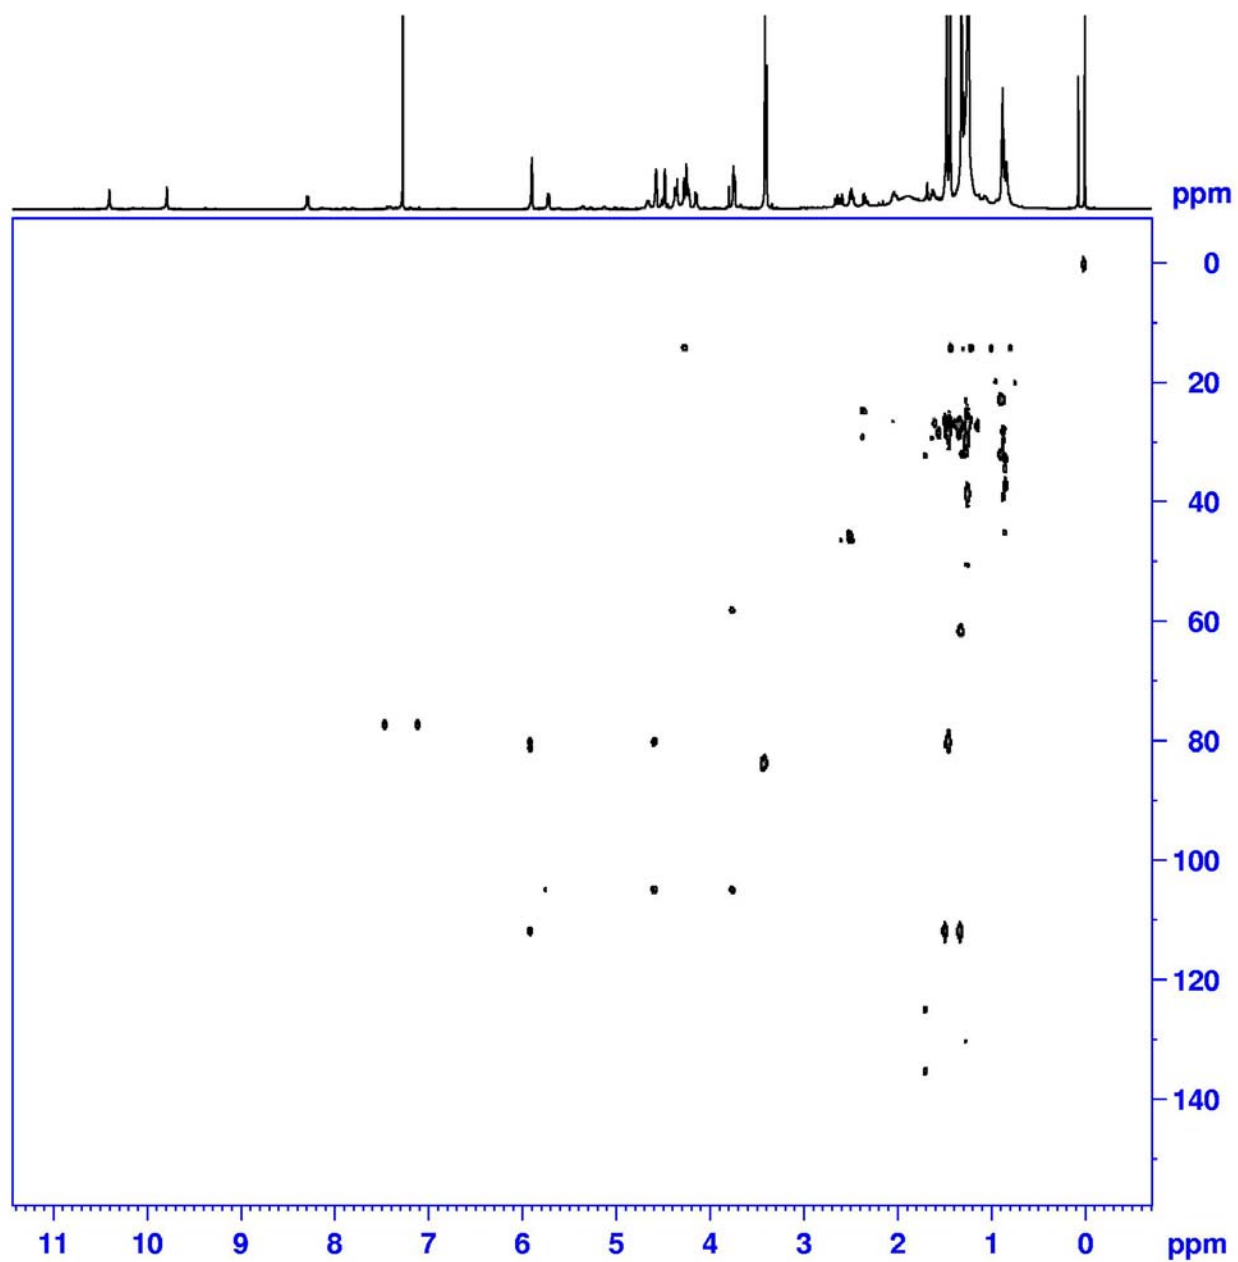

Supporting Figure 17. HMBC spectrum of peptide 5a (600 MHz,  $\text{CDCl}_3$ , 278 K)

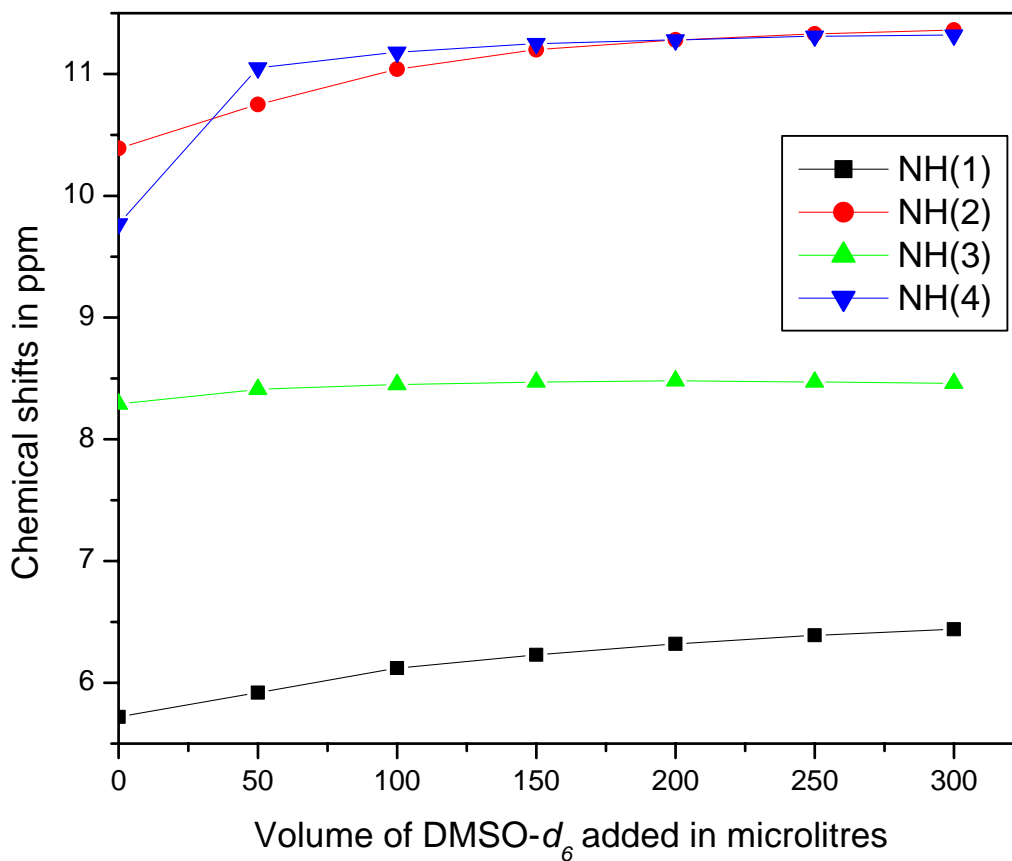

**Supporting Figure 18. Solvent titration plot for 5a**

| Residue | Atom | Residue | Atom                 | Lower bond (Å) | Higher bond (Å) |
|---------|------|---------|----------------------|----------------|-----------------|
| 1       | NH   | 1       | CaH ( <i>pro-R</i> ) | 2.70           | 3.30            |
| 1       | CβH  | 2       | NH                   | 2.92           | 3.57            |
| 1       | CβH  | 3       | NH                   | 2.70           | 3.30            |
| 2       | NH   | 1       | CaH ( <i>pro-S</i> ) | 3.18           | 3.88            |
| 2       | NH   | 2       | CaH                  | 3.28           | 4.01            |
| 2       | NH   | 3       | NH                   | 3.40           | 4.15            |
| 3       | NH   | 2       | CaH                  | 2.96           | 3.62            |
| 3       | NH   | 3       | CaH ( <i>pro-R</i> ) | 3.13           | 3.82            |
| 3       | CβH  | 4       | NH                   | 3.12           | 3.81            |
| 4       | NH   | 3       | CaH ( <i>pro-S</i> ) | 2.89           | 3.35            |
| 4       | NH   | 4       | CaH                  | 2.89           | 3.54            |

**Supporting Table 4. Distance constraints used in MD calculations for 5a, derived from ROESY experiment in CDCl<sub>3</sub> (600 MHz, 278 K)**



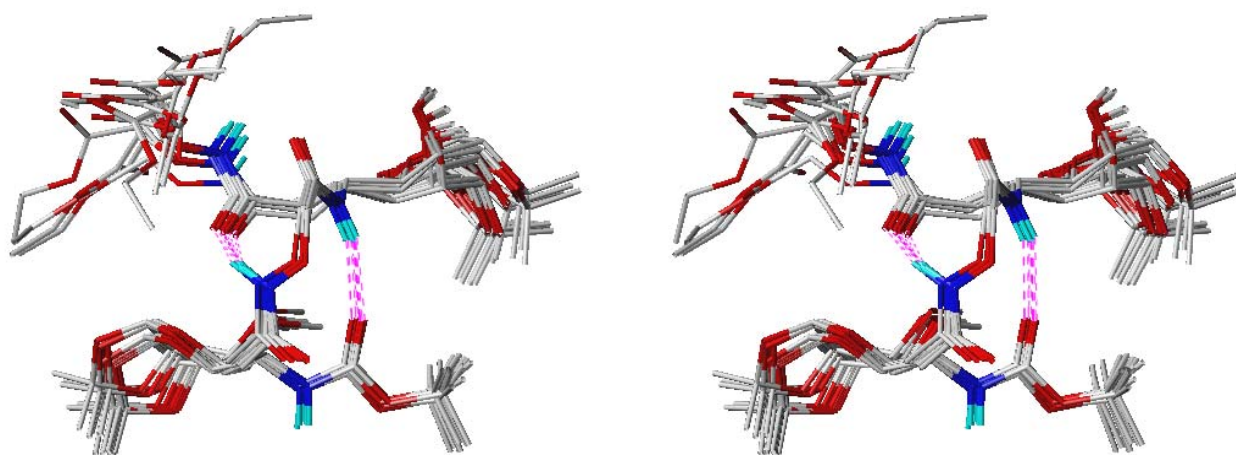

**Supporting Figure 19. Stereoview of twenty superimposed structures of 5a (H-bonds are shown as dotted lines)**

| Residue<br>Protons                                                                                                                                                                                                              | Res-1                             | Res-2        | Res-3                             | Res-4        | Res-5                             | Res-6       |
|---------------------------------------------------------------------------------------------------------------------------------------------------------------------------------------------------------------------------------|-----------------------------------|--------------|-----------------------------------|--------------|-----------------------------------|-------------|
| NH                                                                                                                                                                                                                              | 5.83<br>(d, $J = 9.8$ )           | 10.61<br>(s) | 8.33<br>(d, $J = 8.2$ )           | 10.58<br>(s) | 8.35<br>(d, $J = 9.0$ )           | 9.95<br>(s) |
| C $\alpha$ H                                                                                                                                                                                                                    | 2.61<br>(dd, $J = 3.6$ ,<br>14.3) | 4.38<br>(m)  | 2.79<br>(dd, $J = 3.3$ ,<br>14.7) | 4.42<br>(m)  | 2.63<br>(dd, $J = 3.6$ ,<br>14.8) | 4.72<br>(m) |
| C $\alpha'$ H                                                                                                                                                                                                                   | 2.40<br>(dd, $J = 9.2$ ,<br>14.3) | 4.24<br>(m)  | 2.51<br>(dd, $J =$<br>10.0, 14.7) | 4.24<br>(m)  | 2.5<br>(dd, $J = 9.0$ ,<br>14.8)  | 4.72<br>(m) |
| C $\beta$ H                                                                                                                                                                                                                     | 4.43<br>(m)                       | —            | 4.24<br>(m)                       | —            | 4.71<br>(m)                       | —           |
| C4H                                                                                                                                                                                                                             | 4.13<br>(dd, $J = 3.1$ ,<br>7.9)  | —            | 4.32<br>(m)                       | —            | 4.18<br>(dd, $J = 3.1$ ,<br>7.7)  | —           |
| C3H                                                                                                                                                                                                                             | 3.73<br>(d, $J = 3.1$ )           | —            | 3.71<br>(d, $J = 3.1$ )           | —            | 3.74<br>(d, $J = 3.1$ )           | —           |
| C2H                                                                                                                                                                                                                             | 4.56<br>(d, $J = 3.9$ )           | —            | 4.56<br>(d, $J = 3.9$ )           | —            | 4.56<br>(d, $J = 3.9$ )           | —           |
| C1H                                                                                                                                                                                                                             | 5.87<br>(d, $J = 3.9$ )           | —            | 5.80<br>(d, $J = 3.9$ )           | —            | 5.90<br>(d, $J = 3.9$ )           | —           |
| Acetonides(6): 1.47 (6H, 2s), 1.46 (3H, s), 1.31 (9H, 3s).<br>OMe: 3.40 (3H, s), 3.39 (3H, s), 3.36 (3H, s).<br>Ethyl ester: 4.25 (2H, m, -CH <sub>2</sub> ), 1.31 (3H, t, $J = 7.0$ , -CH <sub>3</sub> ).<br>Boc: 1.99 (9H, s) |                                   |              |                                   |              |                                   |             |

**Supporting Table 5.** <sup>1</sup>H NMR chemical shifts  $\delta$  in ppm with multiplicity and coupling constants  $J$  in Hz (in parentheses) of **5b** (600 MHz, CDCl<sub>3</sub>, 278 K)

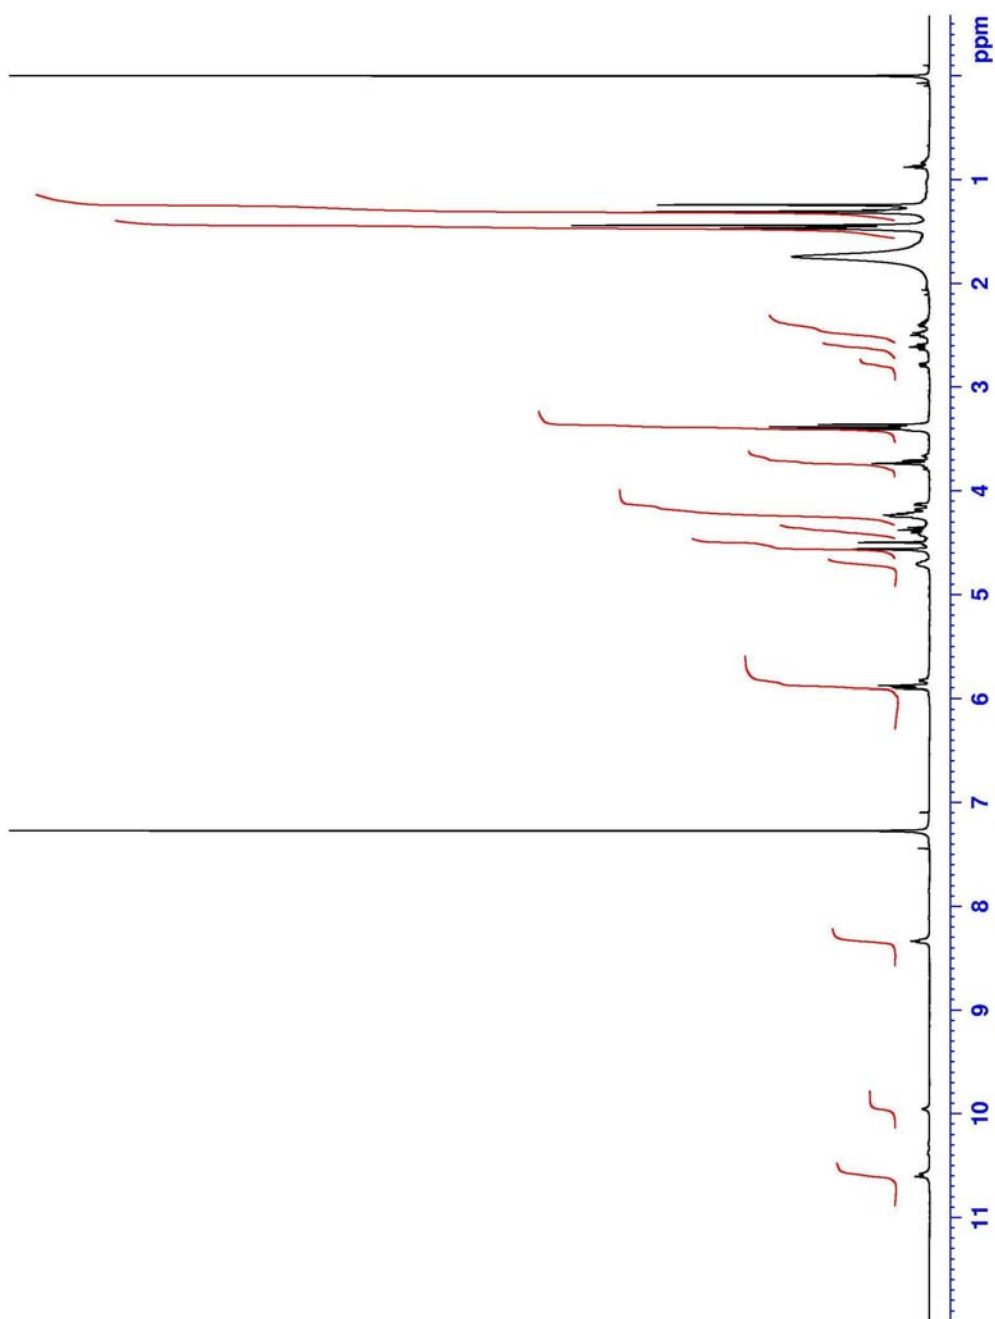

Supporting Figure 20.  $^1\text{H}$  NMR spectrum of 5b (600 MHz,  $\text{CDCl}_3$ , 278 K)

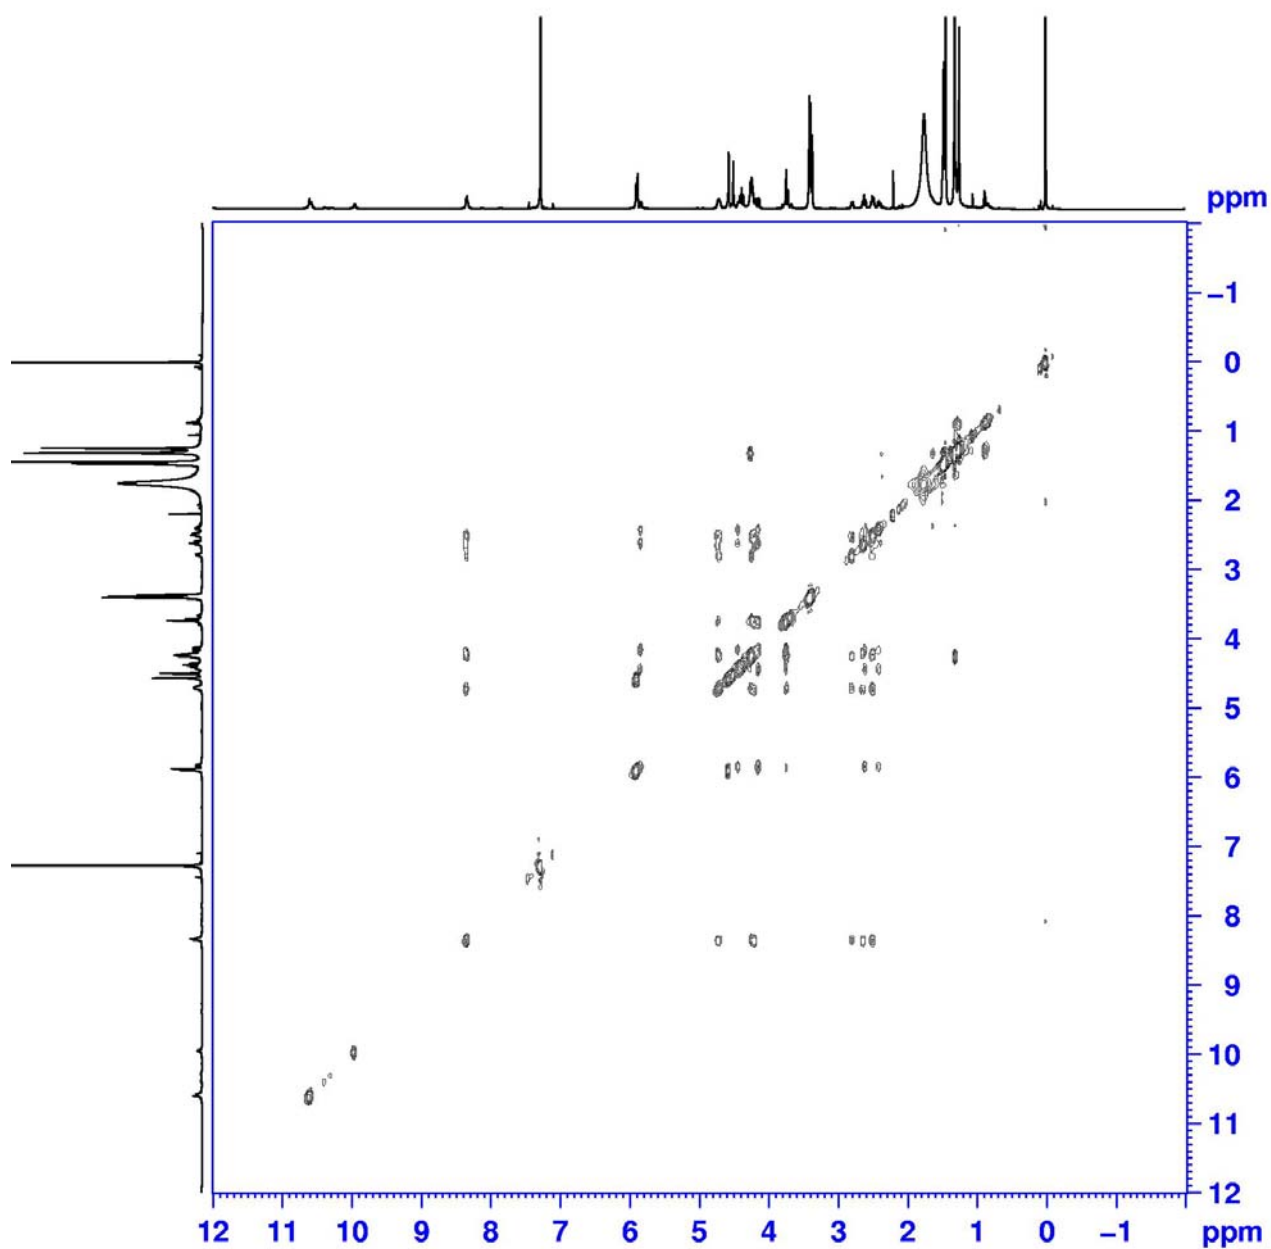

Supporting Figure 21. TOCSY spectrum of peptide 5b (600 MHz, CDCl<sub>3</sub>, 278 K)

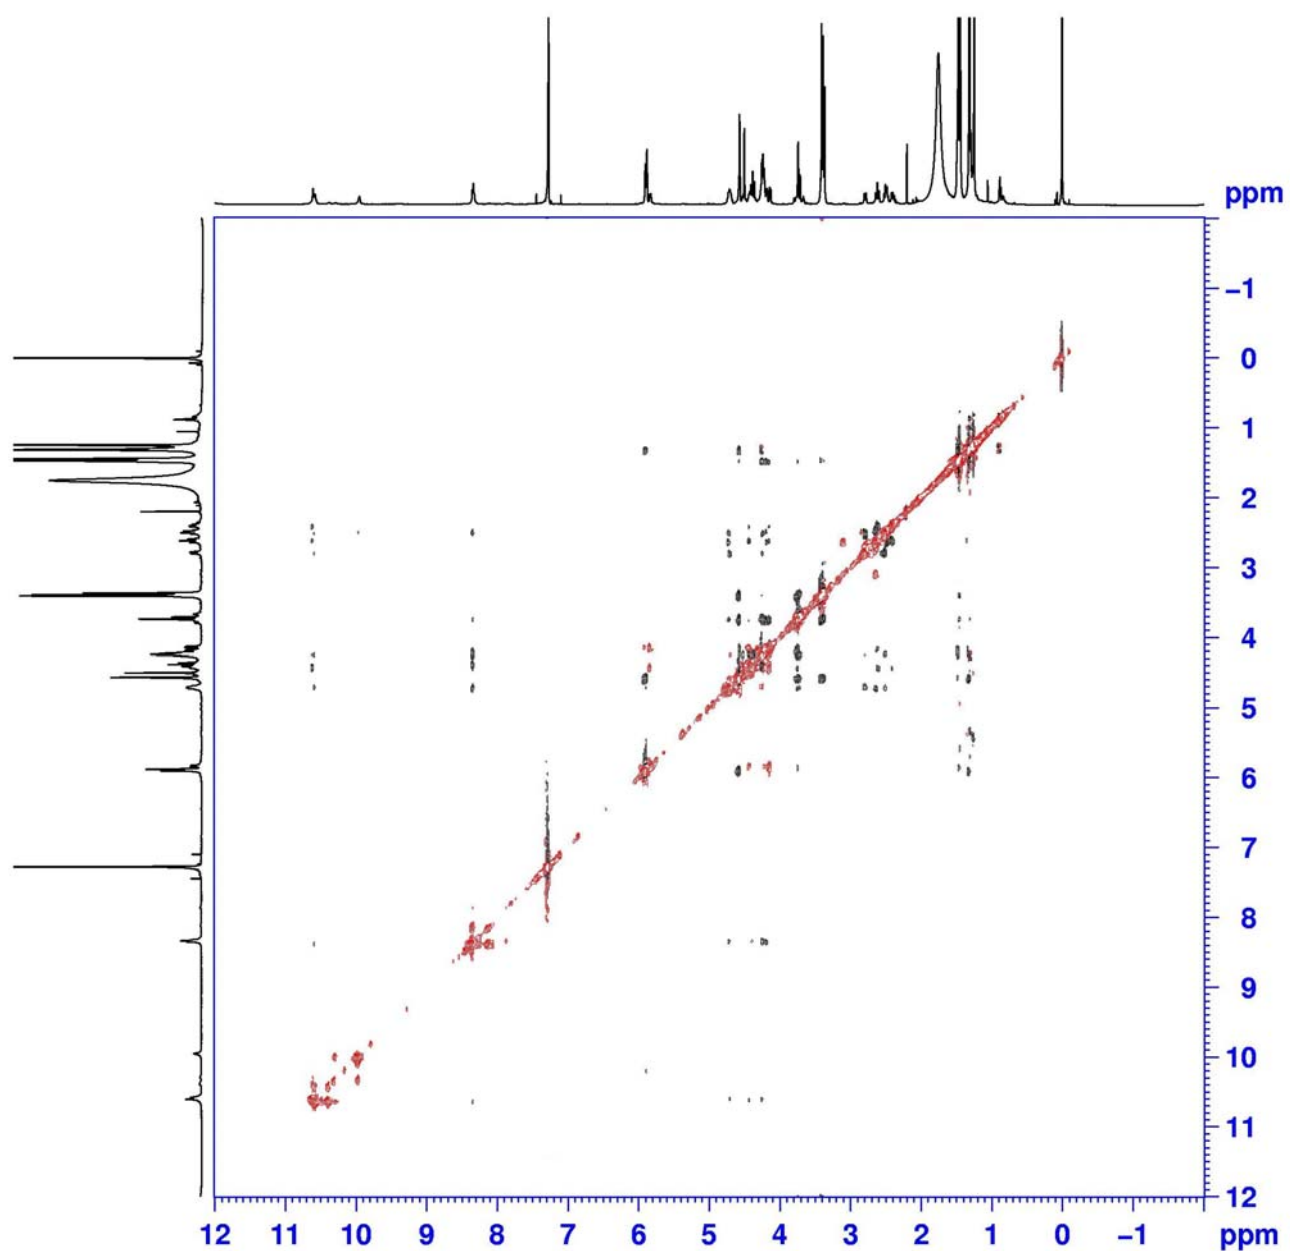

**Supporting Figure 22. ROESY spectrum of peptide 5b (600 MHz, CDCl<sub>3</sub>, 278 K)**

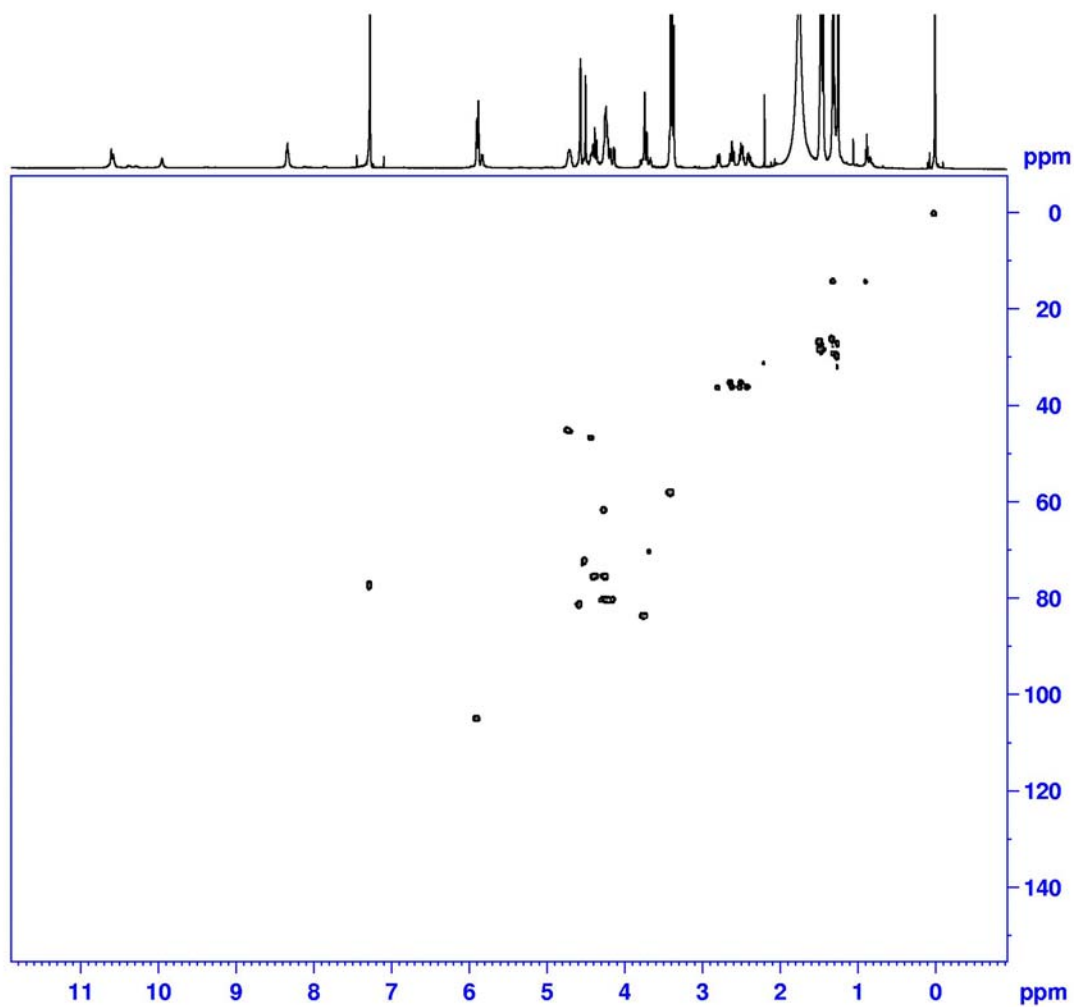

Supporting Figure 23. HSQC spectrum of 5b (600 MHz,  $\text{CDCl}_3$ , 278 K)

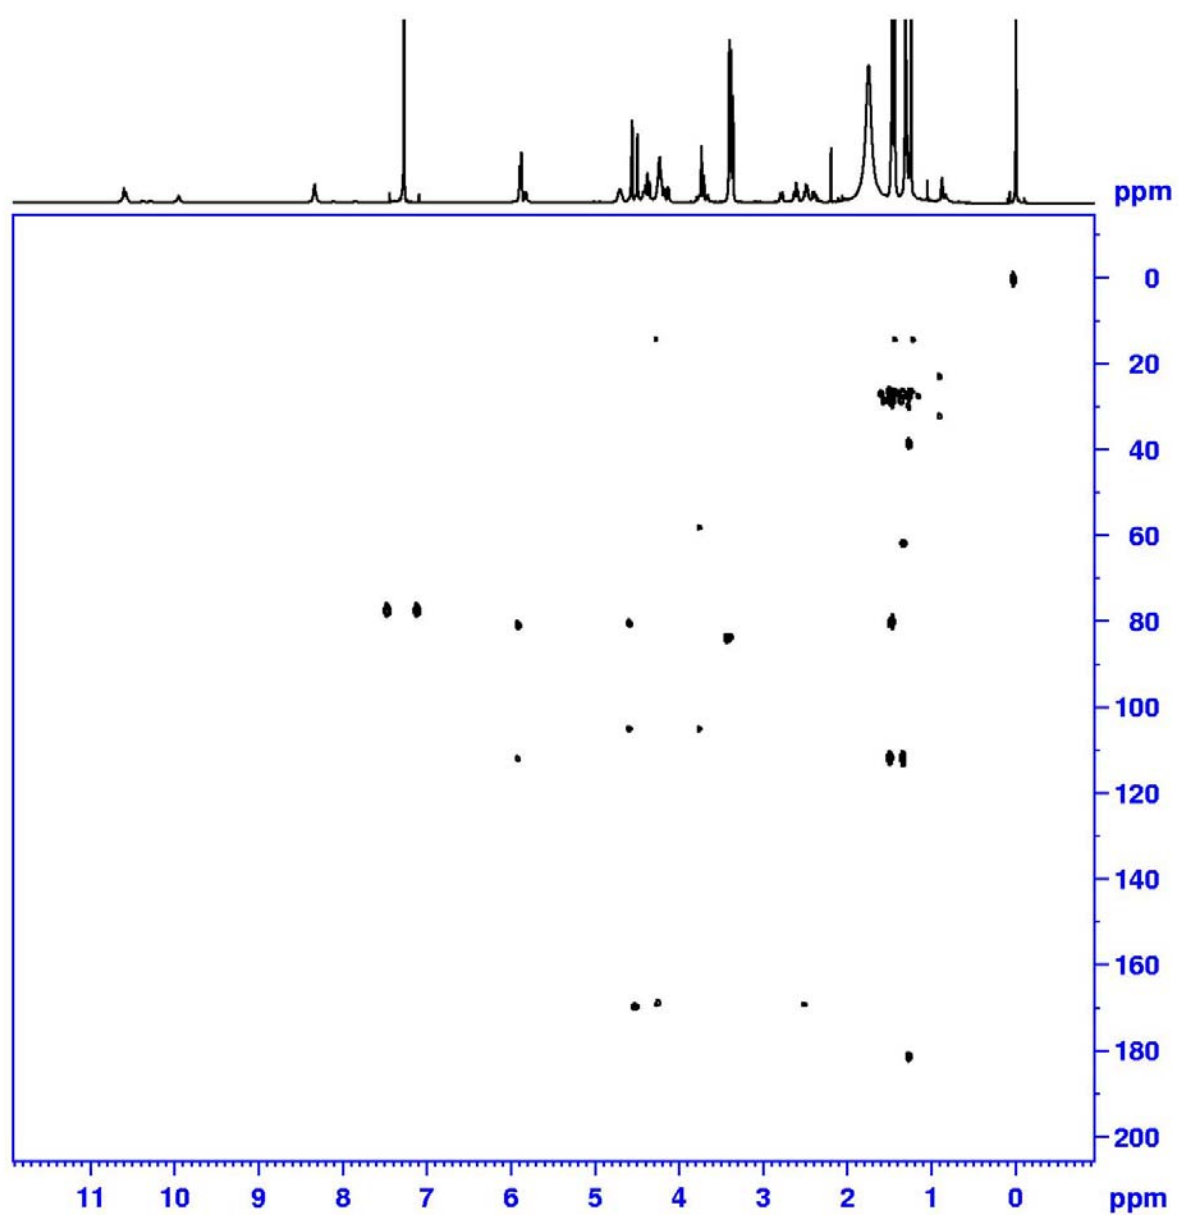

Supporting Figure 24. HMBC spectrum of peptide 5b (600 MHz,  $\text{CDCl}_3$ , 278 K)

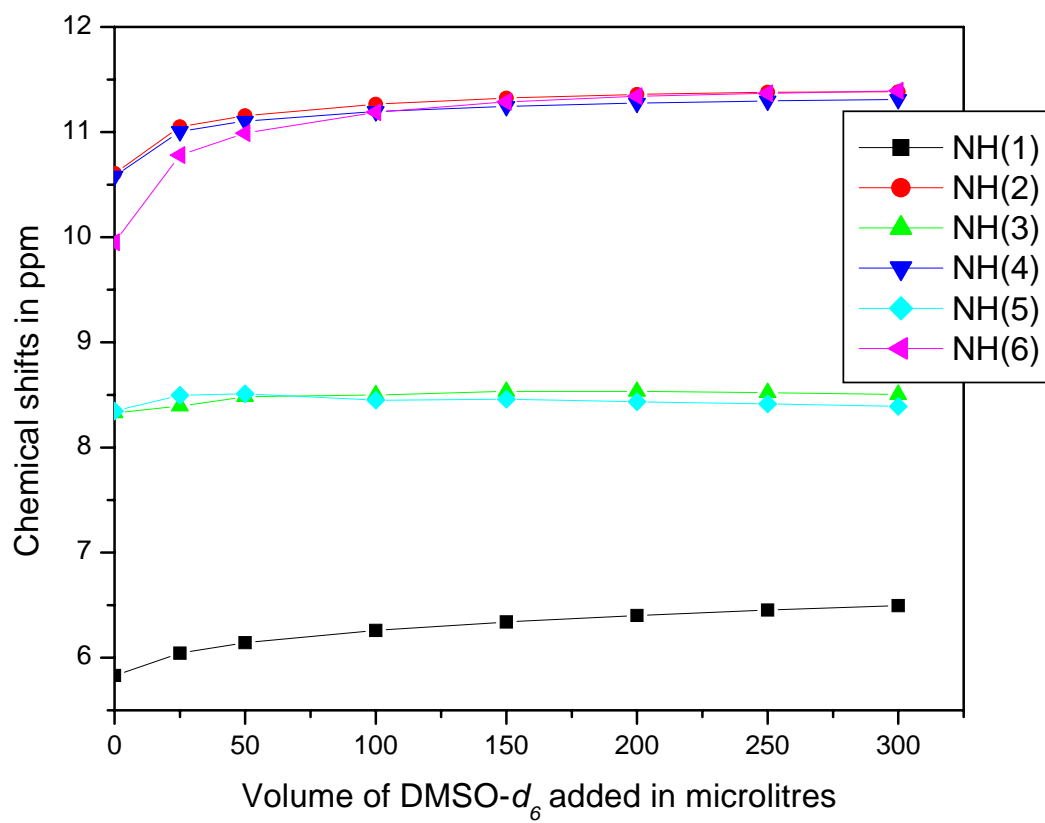

**Supporting Figure 25. Solvent titration plot for peptide 5b**



**Supporting Table 6.**  $^1\text{H}$  NMR chemical shifts  $\delta$  in ppm with multiplicity and coupling constants  $J$  in Hz (in parentheses) of 3b (600 MHz,  $\text{CDCl}_3$ , 278 K)

| Residue<br>Protons                                                                                        | Res-1                                             | Res-2                     | Res-3                                             | Res-4                     |
|-----------------------------------------------------------------------------------------------------------|---------------------------------------------------|---------------------------|---------------------------------------------------|---------------------------|
| NH                                                                                                        | 5.18<br>(d, $J = 8.8$ )                           | 10.4<br>(s)               | 8.21<br>(d, $J = 7.8$ )                           | 9.72<br>(s)               |
| $\text{C}\alpha\text{H}$                                                                                  | 2.46<br>(dd, $J = 4.8$ ,<br>14.5)<br><i>pro S</i> | 4.25<br>(q, $J = 7.1$ )   | 2.39<br>(dd, $J = 5.0$ ,<br>14.0)<br><i>pro S</i> | 4.57<br>(q, $J = 7.2$ )   |
| $\text{C}\alpha'\text{H}$                                                                                 | 2.29<br>(dd, $J = 8.8$ ,<br>14.5)<br><i>pro R</i> | —                         | 2.34<br>(dd, $J =$<br>8.5, 14.0)<br><i>pro R</i>  | —                         |
| $\text{C}\beta\text{H}$                                                                                   | 4.05<br>(m)                                       | 1.42<br>(d, , $J = 7.1$ ) | 4.24<br>(m)                                       | 1.49<br>(d, , $J = 7.2$ ) |
| $\text{C}\gamma\text{H}$                                                                                  | 1.22<br>(d, , $J = 6.9$ )                         | —                         | 1.25 (d, $J =$<br>6.9)                            | —                         |
| Ethyl ester: 4.25 (2H, m, $-\text{CH}_2$ ), 1.31 (3H, t, $J = 7.2$ , $-\text{CH}_3$ )<br>Boc: 1.43(9H, s) |                                                   |                           |                                                   |                           |

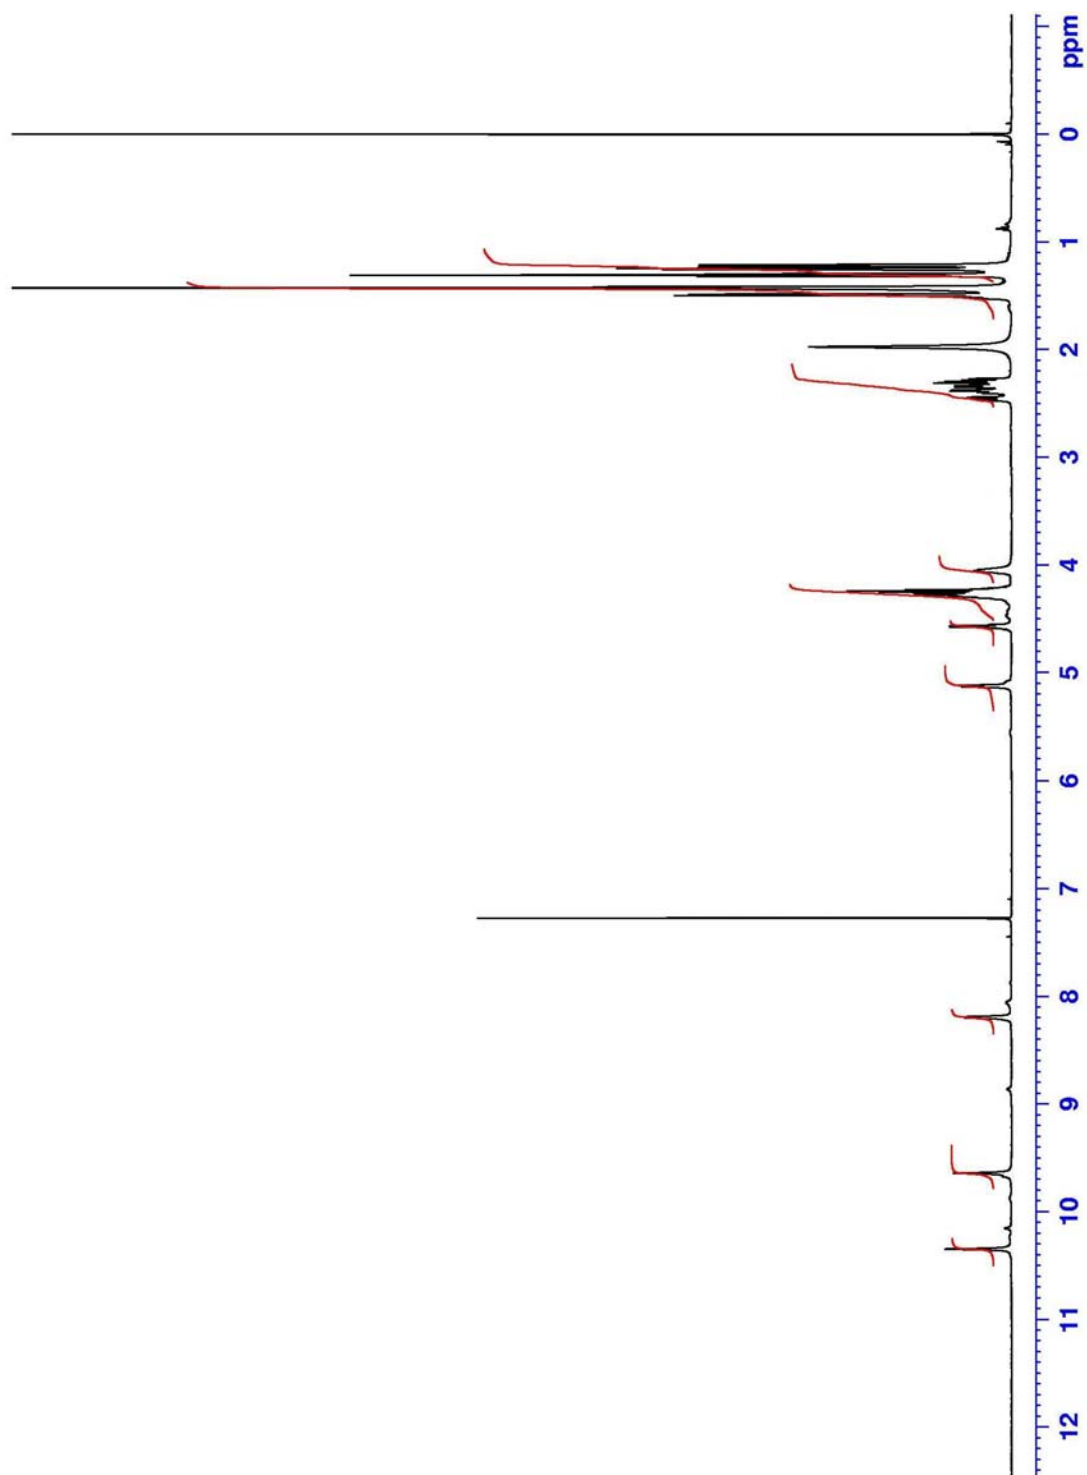

Supporting Figure 26.  $^1\text{H}$  NMR spectrum of peptide 3b (600 MHz,  $\text{CDCl}_3$ , 278 K)

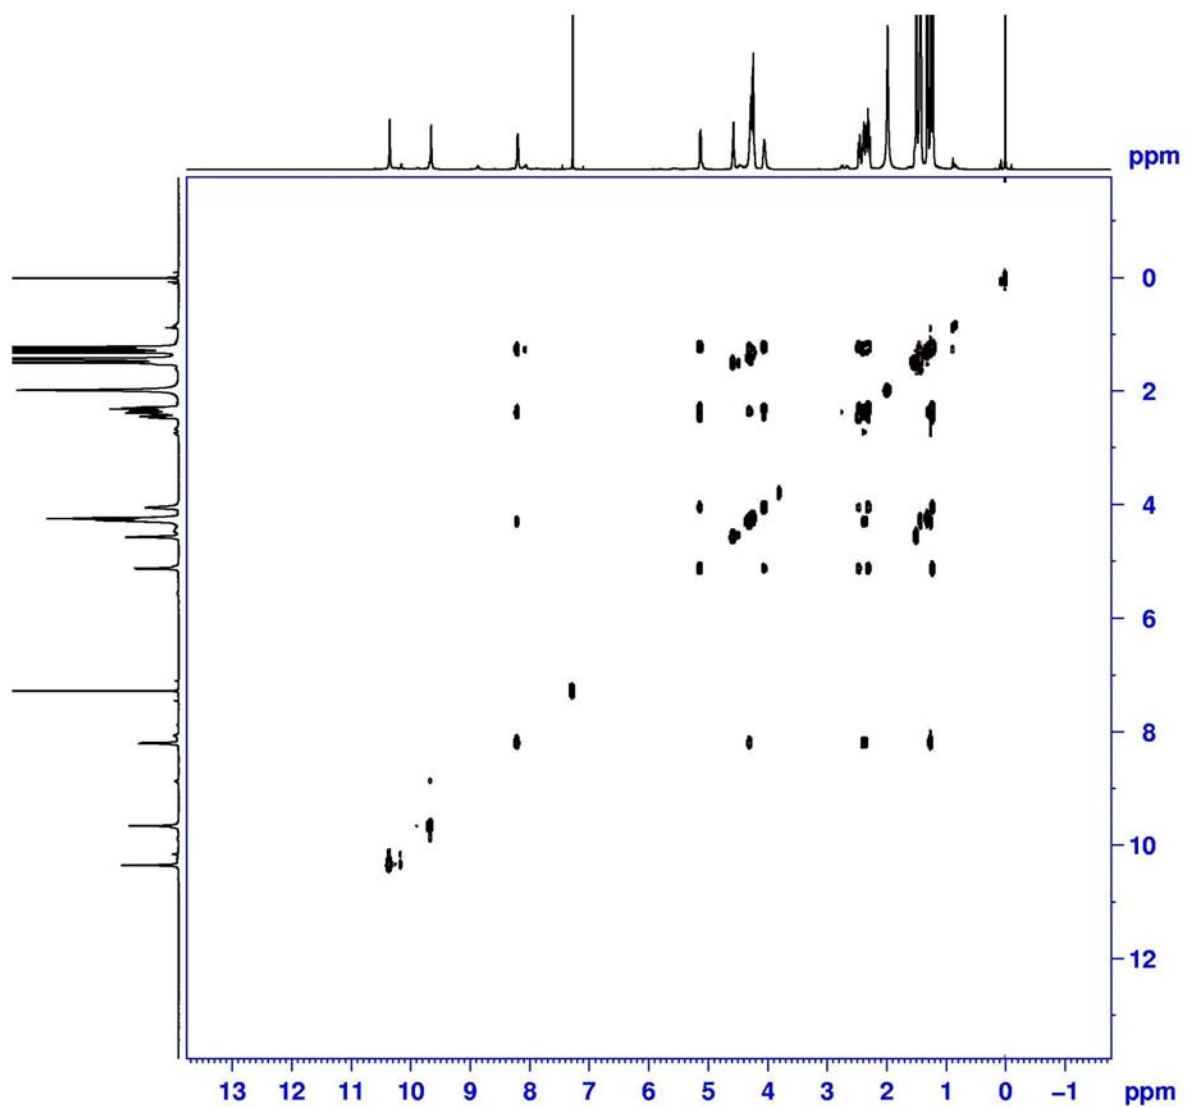

**Supporting Figure 27. TOCSY spectrum of peptide 3b (600 MHz, CDCl<sub>3</sub>, 278 K)**

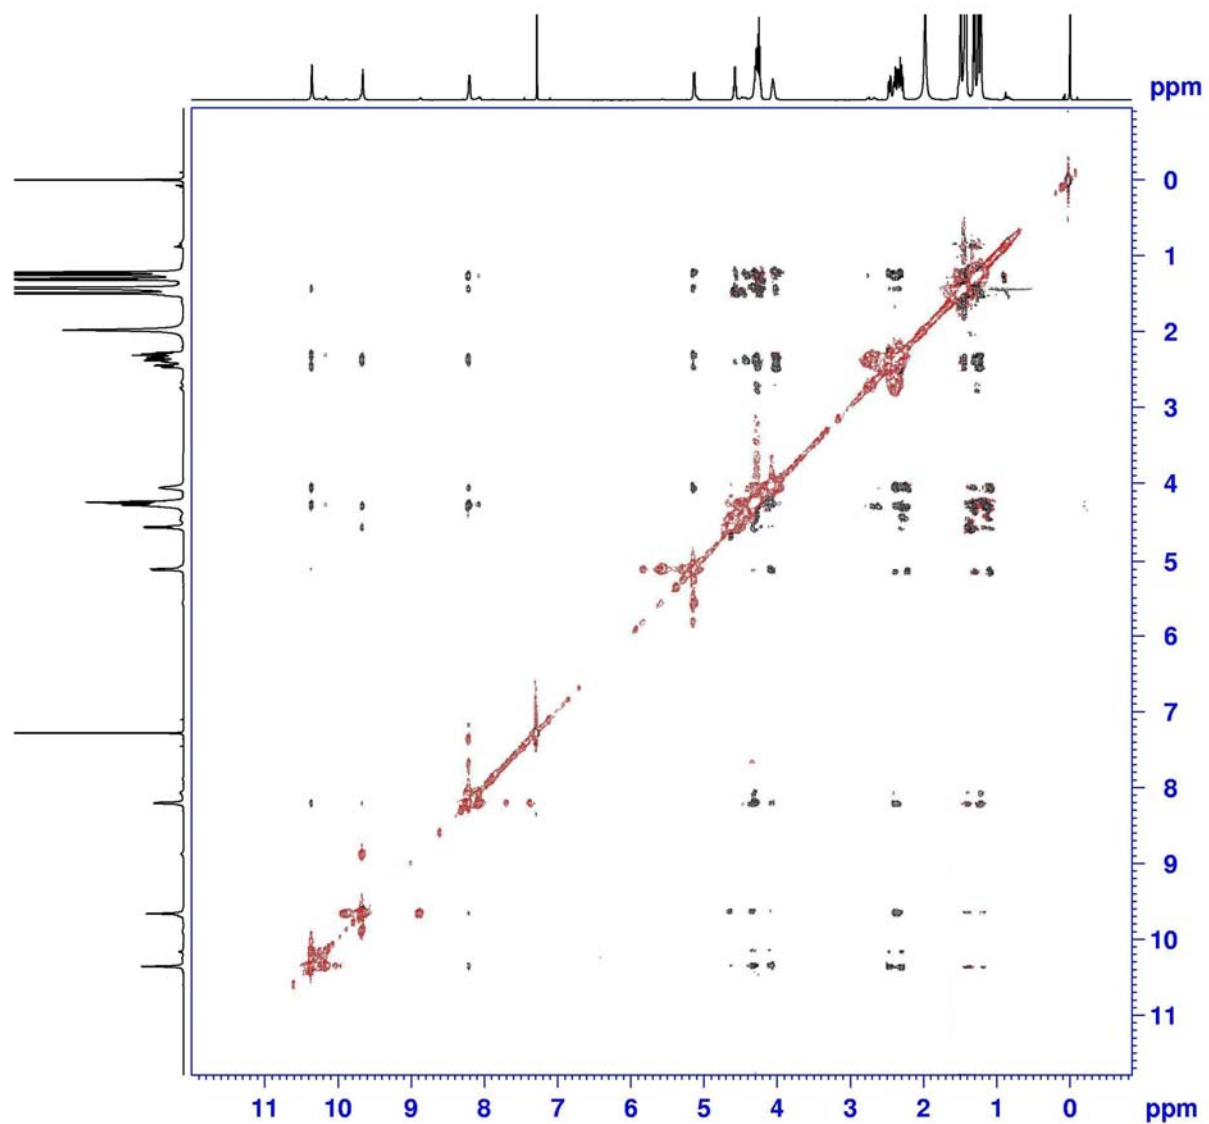

**Supporting Figure 28. ROESY spectrum of peptide 3b (600 MHz, CDCl<sub>3</sub>, 278 K)**

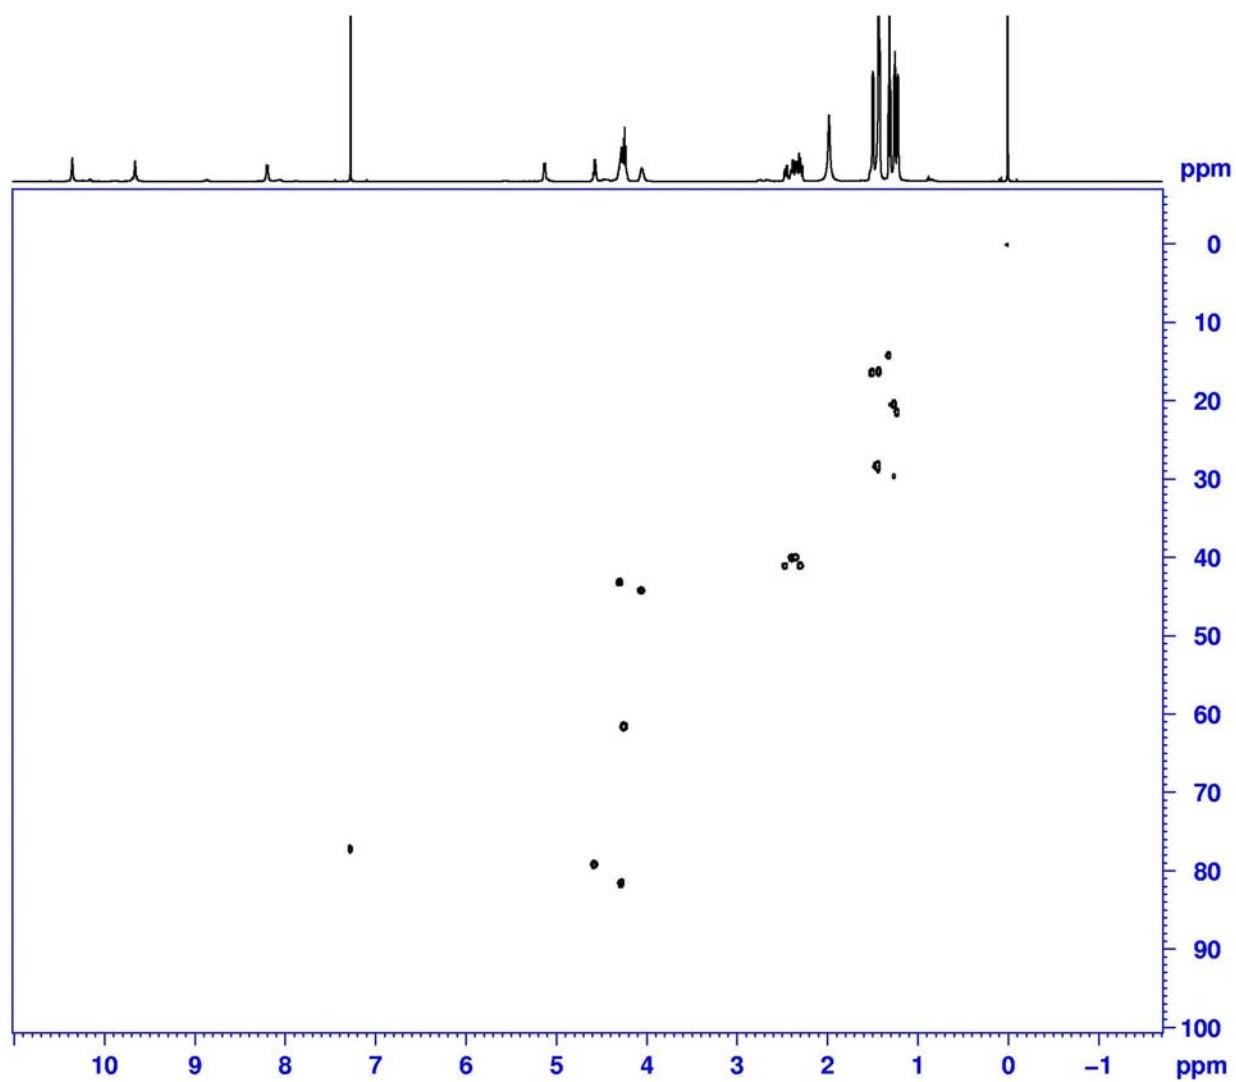

**Supporting Figure 29. HSQC spectrum of peptide 3b (600 MHz,  $\text{CDCl}_3$ , 278 K)**

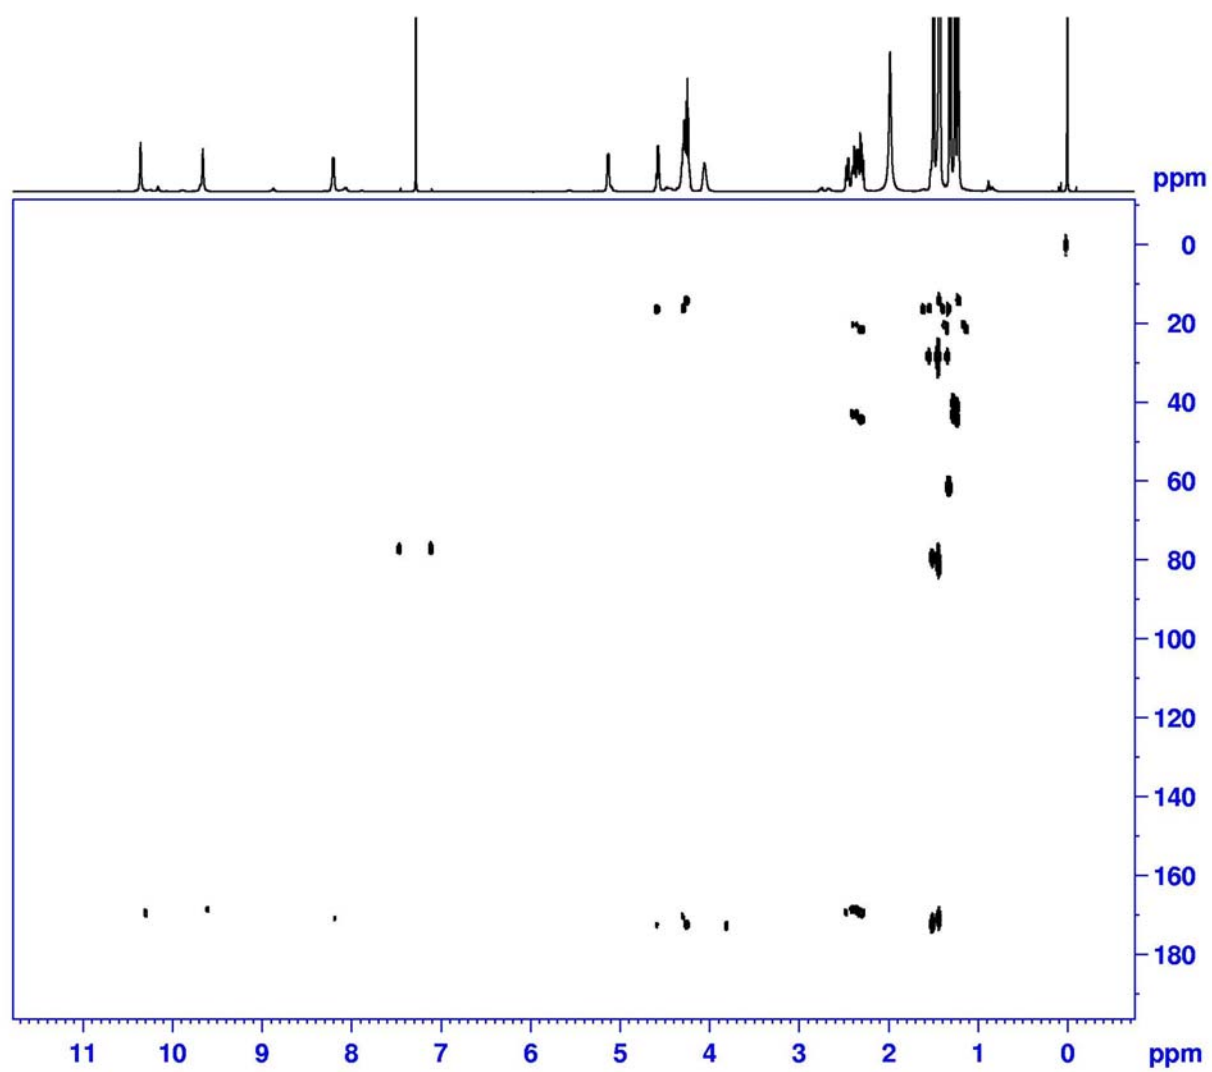

**Supporting Figure 30. HMBC spectrum of peptide 3b (600 MHz,  $\text{CDCl}_3$ , 278 K)**

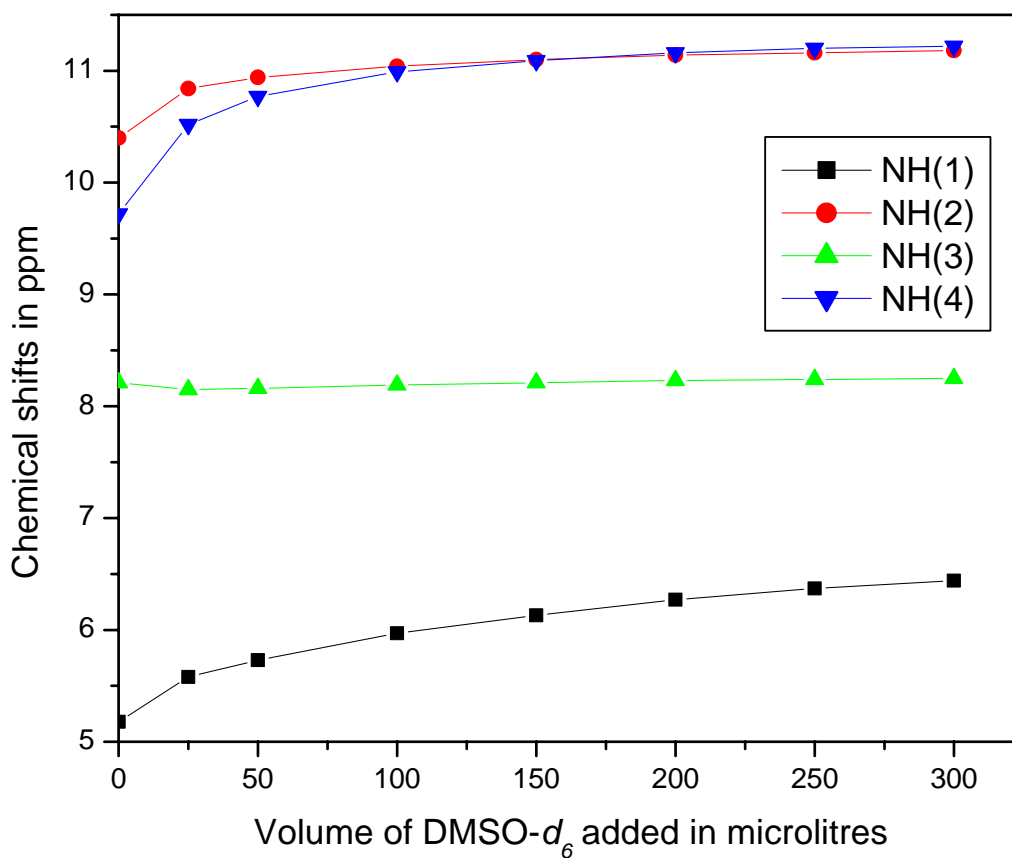

**Supporting Figure 31. Solvent titration plot for peptide 3b**

| Residue | Atom | Residue | Atom                 | Lower bond (Å) | Higher bond (Å) |
|---------|------|---------|----------------------|----------------|-----------------|
| 1       | NH   | 1       | CaH ( <i>pro-R</i> ) | 2.87           | 3.51            |
| 1       | CβH  | 2       | NH                   | 3.08           | 3.76            |
| 1       | CβH  | 3       | NH                   | 3.33           | 4.07            |
| 1       | CβH  | 3       | CaH ( <i>pro-R</i> ) | 1.9            | 2.31            |
| 2       | NH   | 1       | CaH ( <i>pro-S</i> ) | 3.13           | 3.83            |
| 2       | NH   | 2       | CaH                  | 3.56           | 4.34            |
| 2       | NH   | 3       | NH                   | 3.49           | 4.27            |
| 3       | NH   | 3       | CaH ( <i>pro-R</i> ) | 2.97           | 3.63            |
| 3       | CβH  | 4       | NH                   | 3.22           | 3.94            |
| 4       | NH   | 3       | CaH ( <i>pro-S</i> ) | 3.35           | 3.69            |

**Supporting Table 7. Distance constraints used in MD calculations for peptide 3b, derived from ROESY experiment in CDCl<sub>3</sub> (600 MHz, 278 K)**

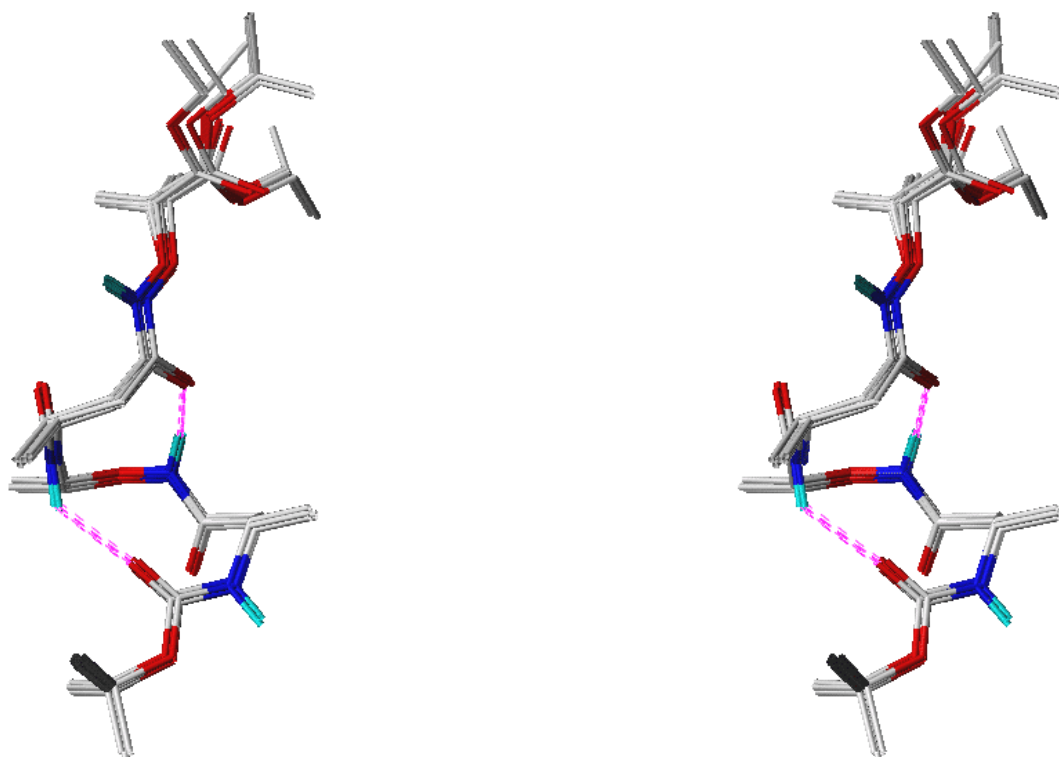

**Supporting Figure 32. Stereoview of twenty superimposed structures of 3b (H-bonds are shown as dotted lines)**



| Residue<br>Protons                                                                                            | Res-1                              | Res-2                   | Res-3                             | Res-4                   | Res-5                             | Res-6                   |
|---------------------------------------------------------------------------------------------------------------|------------------------------------|-------------------------|-----------------------------------|-------------------------|-----------------------------------|-------------------------|
| NH                                                                                                            | 5.06<br>(d, $J = 10.1$ )           | 10.62<br>(s)            | 8.52<br>(d, $J = 9.3$ )           | 10.72<br>(s)            | 8.44<br>(d, $J = 8.2$ )           | 9.73<br>(s)             |
| C $\alpha$ H                                                                                                  | 2.57<br>(dd, $J = 3.6$ ,<br>13.8)  | 4.21<br>(q, $J = 7.0$ ) | 2.62<br>(dd, $J = 3.3$ ,<br>13.9) | 4.24<br>(q, $J = 7.0$ ) | 2.50<br>(dd, $J = 3.9$ ,<br>13.9) | 4.66<br>(q, $J = 7.0$ ) |
| C $\alpha'$ H                                                                                                 | 2.14<br>(dd, $J = 10.8$ ,<br>13.8) | –                       | 2.21<br>(dd, $J = 9.9$ ,<br>13.9) | –                       | 2.23<br>(dd, $J = 9.3$ ,<br>13.9) | –                       |
| C $\beta$ H                                                                                                   | 4.21<br>(m)                        | 1.40<br>(d, $J = 7.0$ ) | 4.46<br>(m)                       | 1.39<br>(d, $J = 7.0$ ) | 4.35<br>(m)                       | 1.51<br>(d, $J = 7.0$ ) |
| C $\gamma$ H                                                                                                  | 1.21<br>(d, $J = 6.9$ )            | –                       | 1.29<br>(d, $J = 6.8$ )           | –                       | 1.26<br>(d, $J = 6.7$ )           | –                       |
| Ethyl ester: 4.25 (2H, m, -CH <sub>2</sub> ), 1.31 (3H, t, $J = 7.1$ , -CH <sub>3</sub> )<br>Boc: 1.43(9H, s) |                                    |                         |                                   |                         |                                   |                         |

**Supporting Table 8.** <sup>1</sup>H NMR chemical shifts  $\delta$  in ppm with multiplicity and coupling constants  $J$  in Hz (in parentheses) of **3b** (600 MHz, CDCl<sub>3</sub>, 278 K)

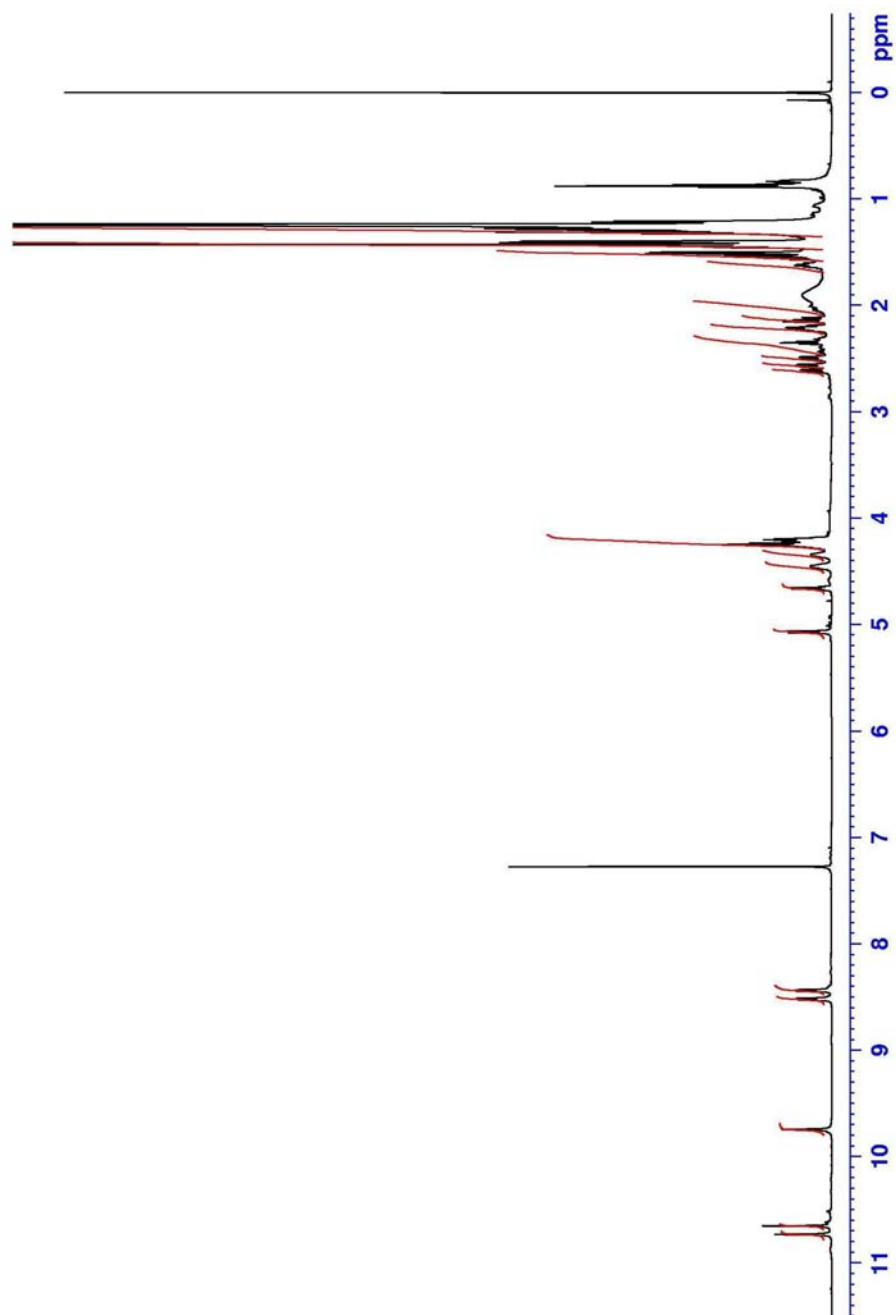

Supporting Figure 33.  $^1\text{H}$  NMR spectrum of peptide 4b (600 MHz,  $\text{CDCl}_3$ , 278K)

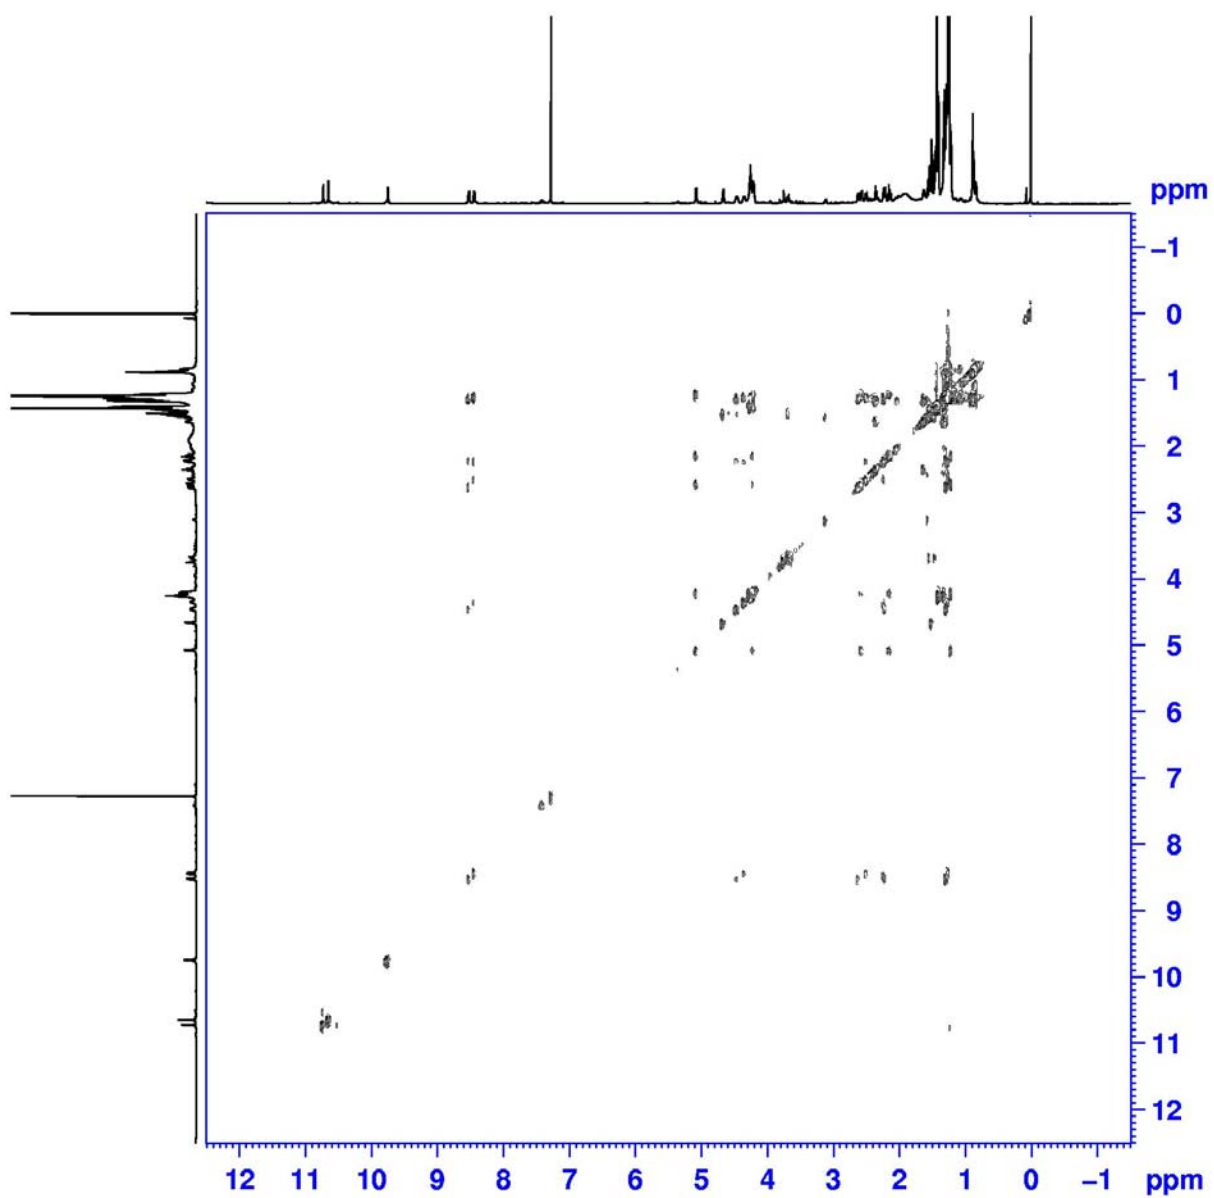

Supporting Figure 34. TOCSY spectrum of peptide 4b (600 MHz, CDCl<sub>3</sub>, 278 K)

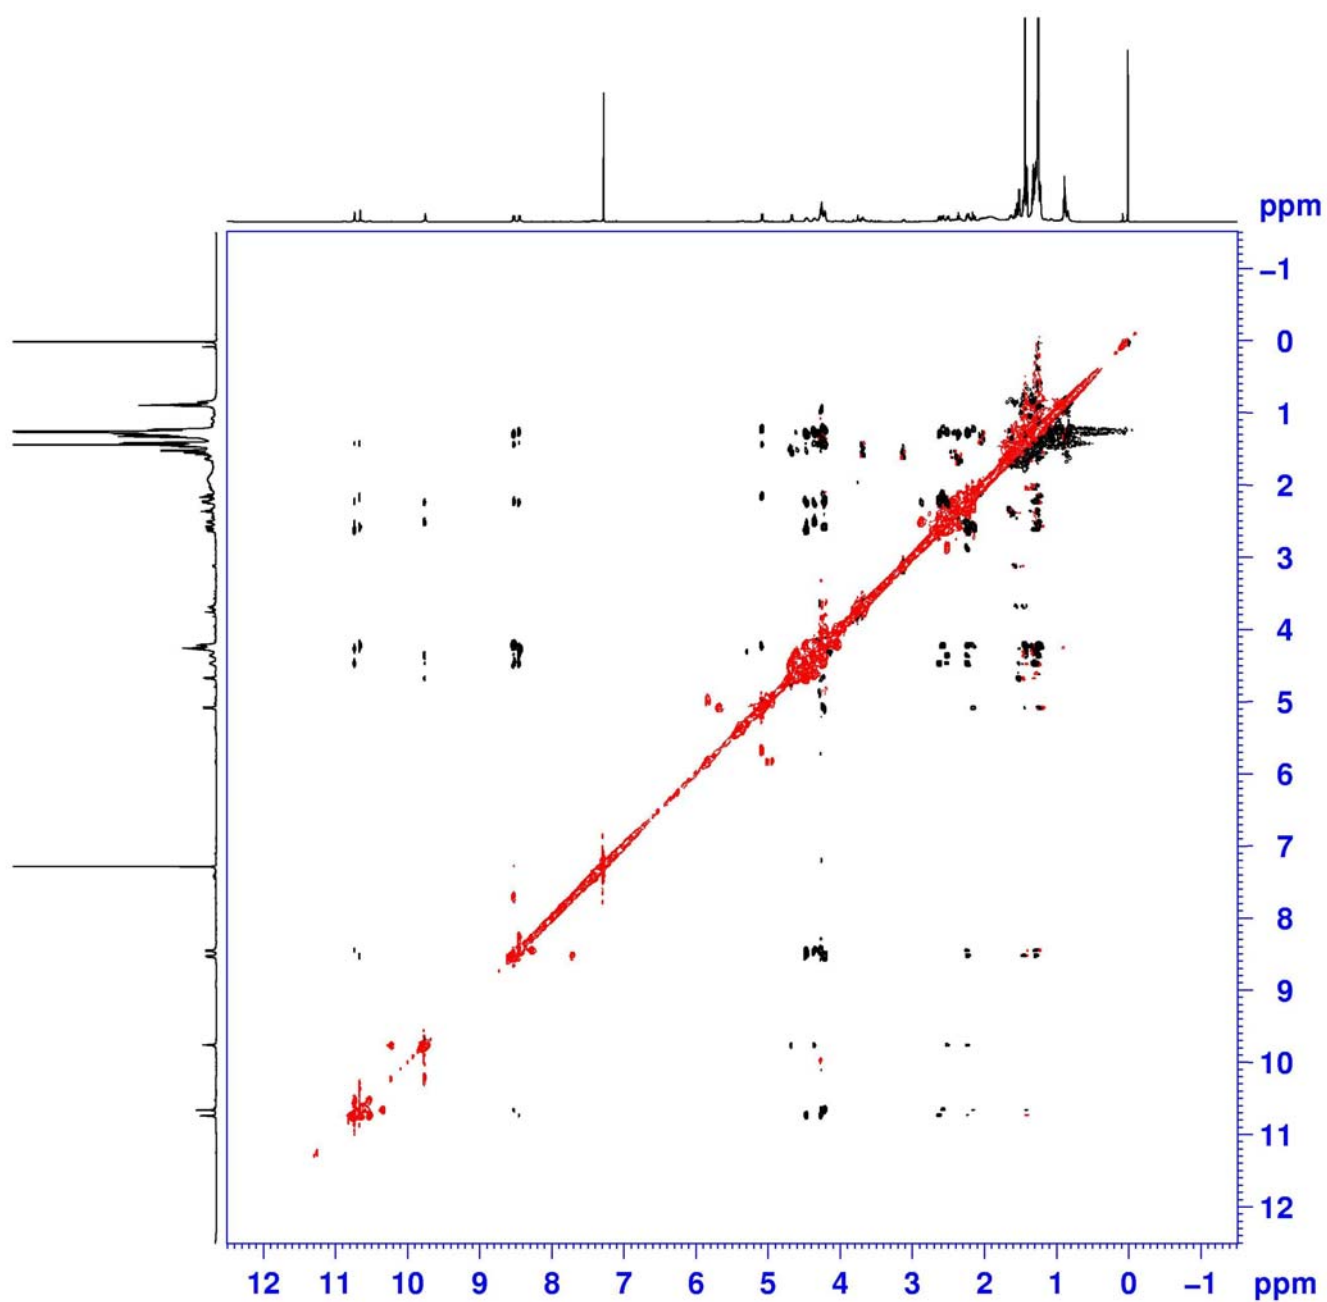

Supporting Figure 35. ROESY spectrum of peptide 4b (600 MHz, CDCl<sub>3</sub>, 278 K)

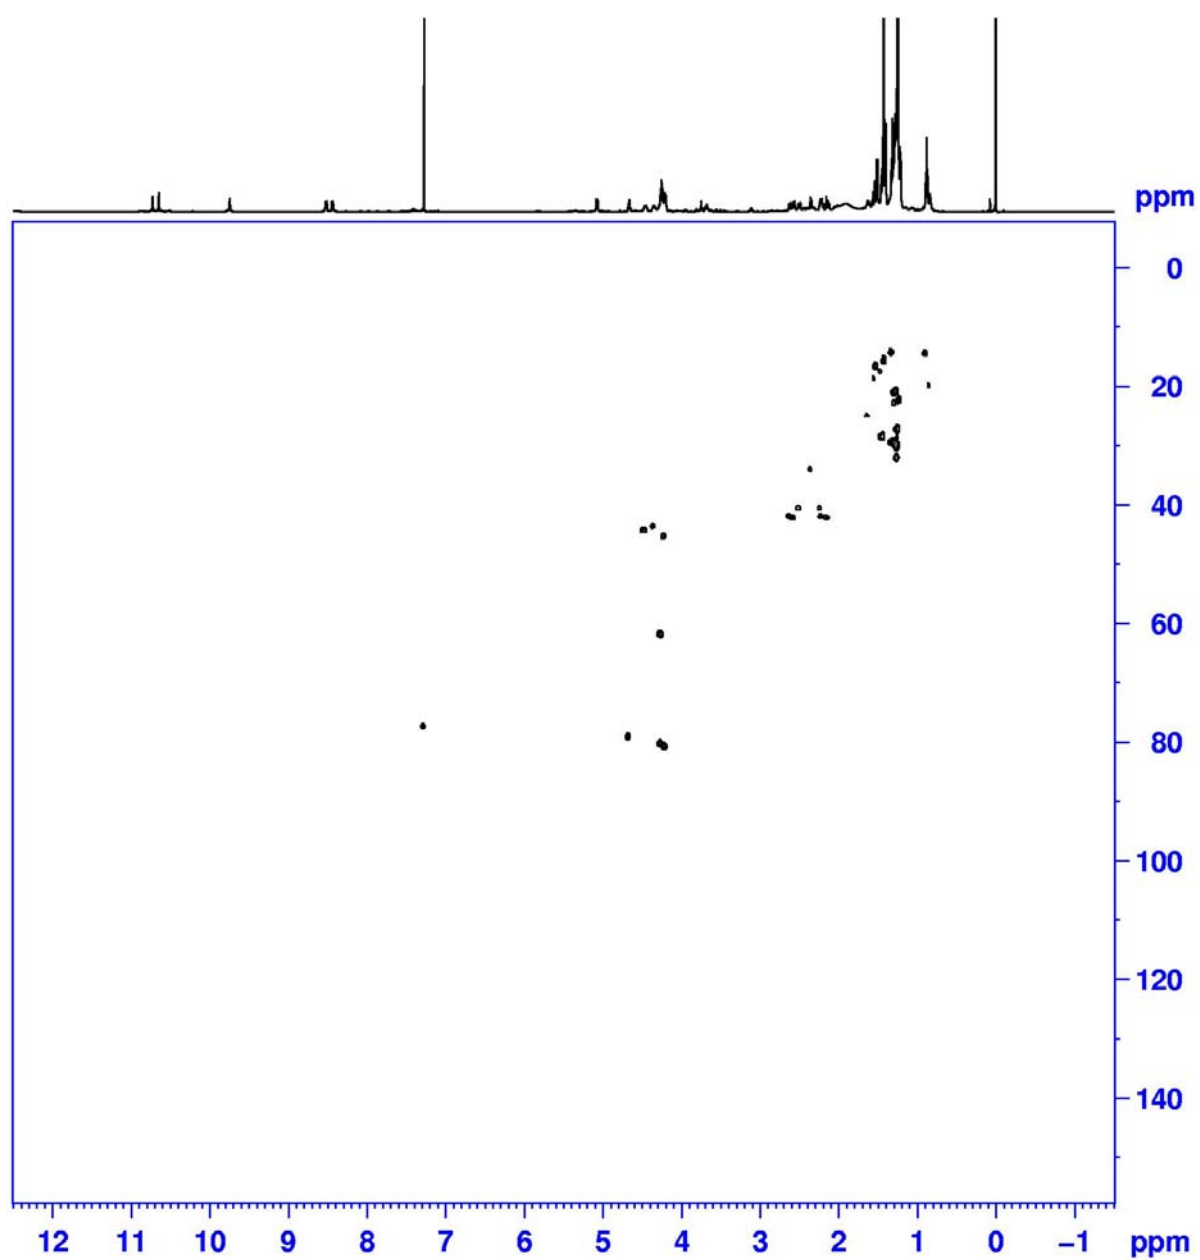

Supporting Figure 36. HSQC spectrum of peptide 4b (600 MHz,  $\text{CDCl}_3$ , 278 K)

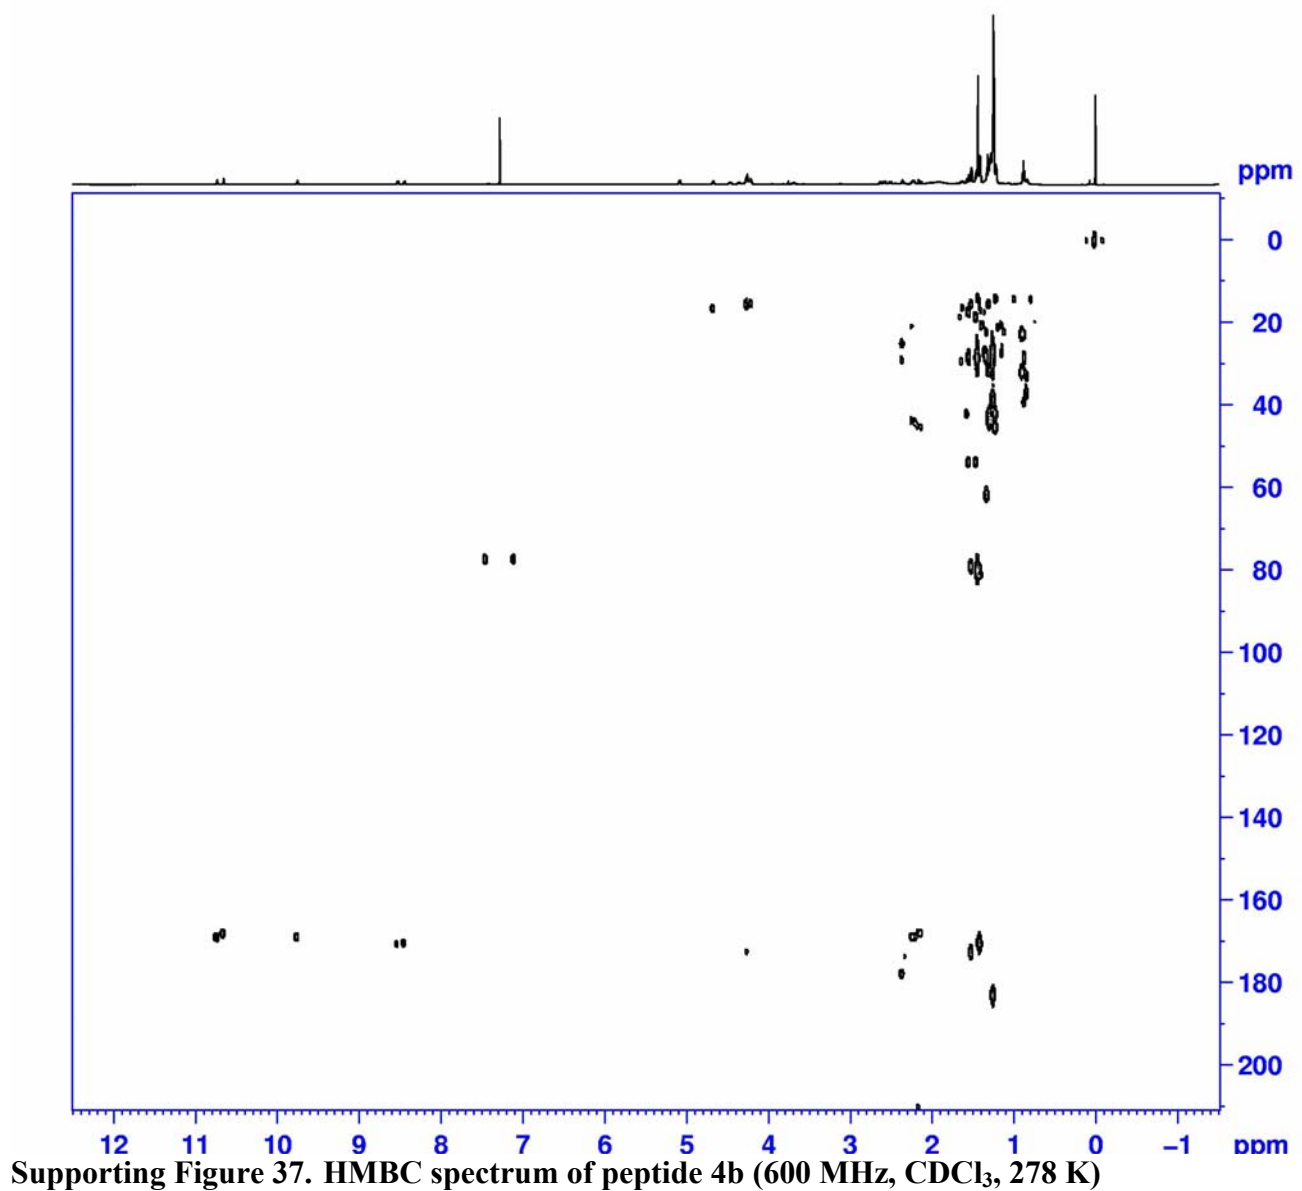

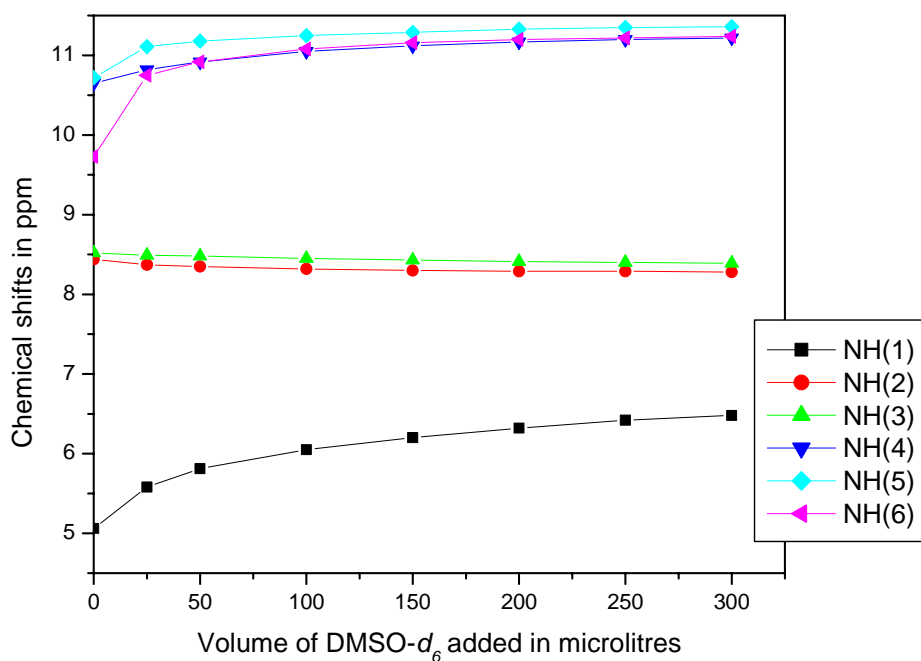

Figure 38. Solvent titration plot for peptide 4b

Supporti

| Residue | Atom | Residue | Atom                 | Lower bond (Å) | Higher bond (Å) |
|---------|------|---------|----------------------|----------------|-----------------|
| 1       | NH   | 1       | CaH ( <i>pro-R</i> ) | 3.21           | 3.92            |
| 1       | CβH  | 2       | NH                   | 3.04           | 3.72            |
| 1       | CβH  | 3       | CaH ( <i>pro-R</i> ) | 2.12           | 2.59            |
| 2       | NH   | 1       | CaH ( <i>pro-S</i> ) | 2.51           | 3.06            |
| 2       | NH   | 2       | CaH                  | 3.13           | 3.82            |
| 2       | NH   | 3       | NH                   | 4.11           | 5.02            |
| 2       | NH   | 4       | CaH                  | 3.02           | 3.70            |
| 3       | NH   | 2       | CaH                  | 2.55           | 3.12            |
| 3       | NH   | 3       | CaH ( <i>pro-R</i> ) | 3.06           | 3.75            |
| 3       | CβH  | 4       | NH                   | 2.55           | 3.11            |
| 3       | CβH  | 5       | NH                   | 3.48           | 4.25            |
| 3       | CβH  | 5       | CaH ( <i>pro-R</i> ) | 2.90           | 3.55            |
| 4       | NH   | 3       | CaH ( <i>pro-S</i> ) | 2.42           | 2.96            |
| 4       | NH   | 5       | NH                   | 4.33           | 5.29            |
| 4       | NH   | 6       | CaH                  | 4.56           | 5.57            |
| 5       | NH   | 4       | CaH                  | 2.53           | 3.09            |
| 5       | NH   | 5       | CaH ( <i>pro-R</i> ) | 2.90           | 3.54            |
| 5       | CβH  | 6       | NH                   | 3.70           | 4.52            |
| 6       | NH   | 5       | CaH ( <i>pro-S</i> ) | 3.09           | 3.78            |

Supporting Table 9. Distance constraints used in MD calculations for peptide 4b, derived from ROESY experiment in CDCl<sub>3</sub> (600 MHz, 278 K)

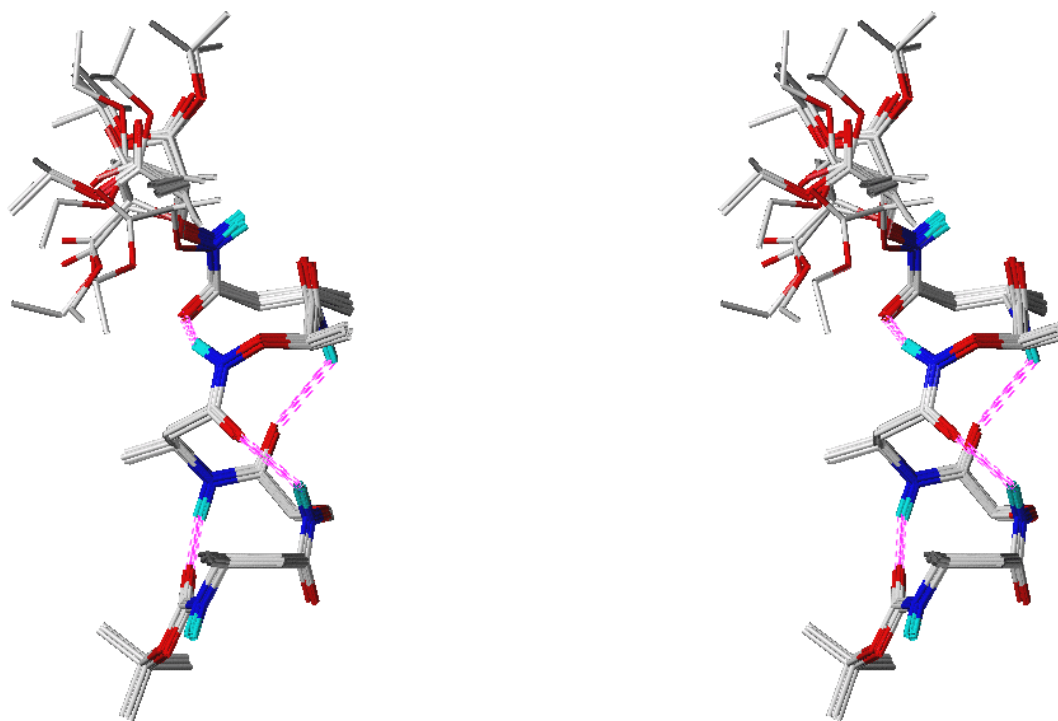

**Supporting Figure 39. Stereoview of twenty superimposed structures of 4b (H-bonds are shown as dotted lines)**



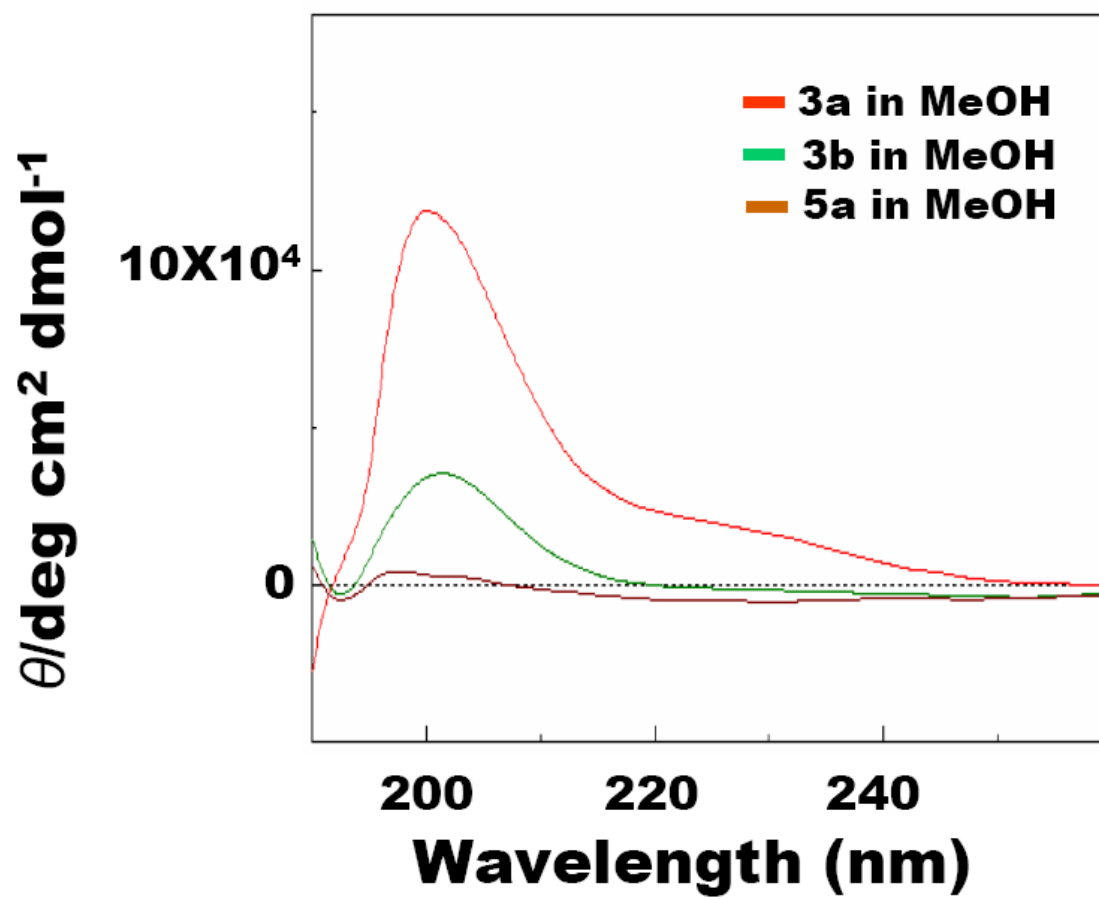

Supporting Figure 40. Circular Dichroism (CD) spectra of peptides 3a, 3b and 5a in methanol

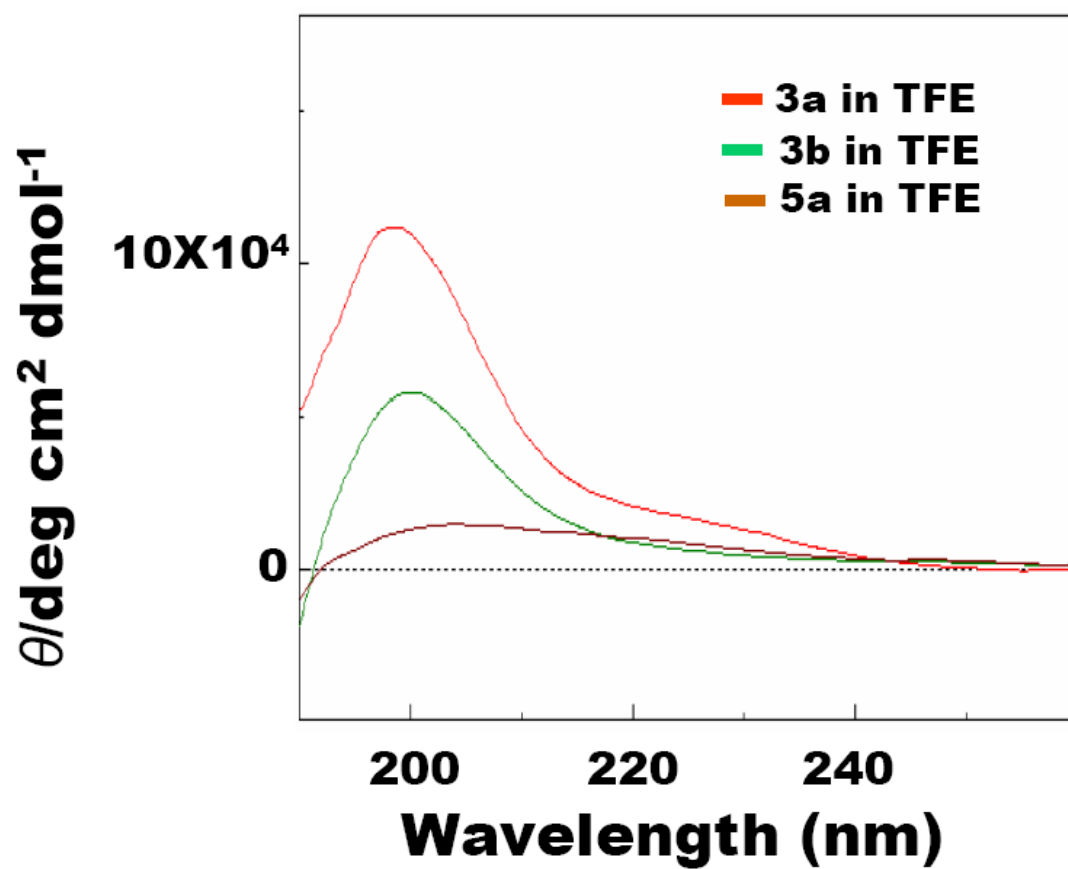

Supporting Figure 41. Circular Dichroism (CD) spectra of peptides 3a, 3b and 5a in TFE

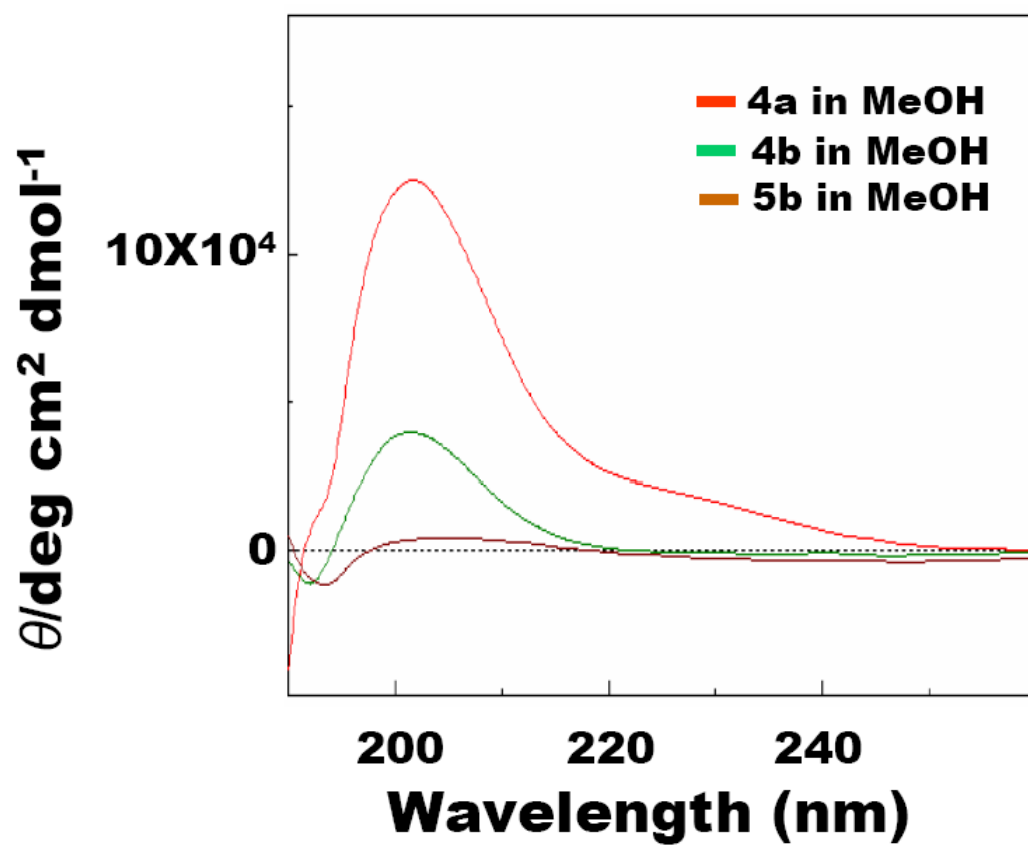

Supporting Figure 42. Circular Dichroism (CD) spectra of peptides 4a, 4b and 5b in methanol

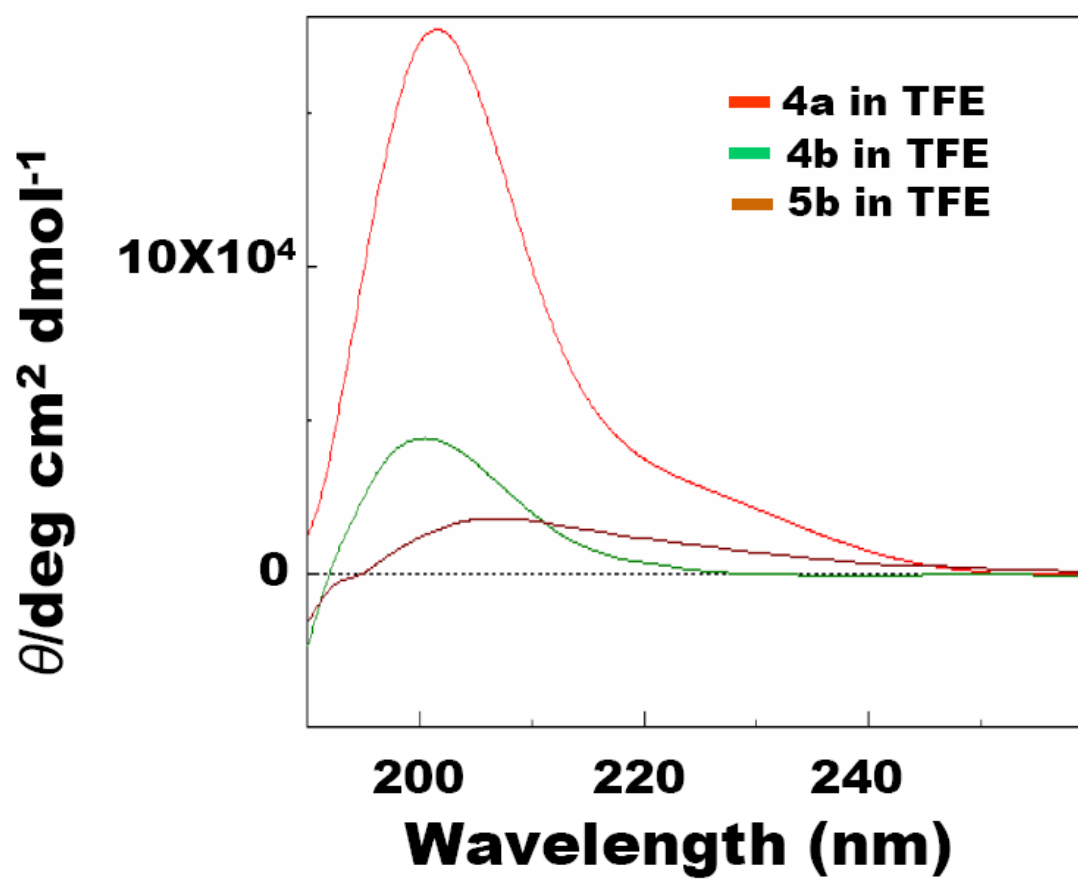

Supporting Figure 43. Circular Dichroism (CD) spectra of peptides 4a, 4b and 5b in TFE
